1 **A multicolor suite for deciphering population coding in calcium and cAMP *in vivo***

2

3 **Tatsushi Yokoyama<sup>1,\*</sup>, Satoshi Manita<sup>2</sup>, Hiroyuki Uwamori<sup>3</sup>, Mio Tajiri<sup>4</sup>, Itaru Imayoshi<sup>5,6,7</sup>, Sho**

4 **Yagishita<sup>4</sup>, Masanori Murayama<sup>3</sup>, Kazuo Kitamura<sup>2</sup>, Masayuki Sakamoto<sup>1,8,9,\*</sup>**

5

6 <sup>1</sup>Department of Optical Neural and Molecular Physiology, Graduate School of Biostudies, Kyoto

7 University, Kyoto, Kyoto 606-8507, Japan; <sup>2</sup>Department of Neurophysiology, Graduate School of

8 Medicine, University of Yamanashi, Chuo, Yamanashi 409-3898, Japan; <sup>3</sup>Department of Haptic

9 Perception and Cognitive Physiology, Center for Brain Science, RIKEN, Wako, Saitama 351-0198,

10 Japan; <sup>4</sup>Department of Structural Physiology, Graduate School of Medicine, The University of Tokyo,

11 Tokyo, Tokyo 113-0033, Japan; <sup>5</sup>Department of Brain Development and Regeneration, Graduate

12 School of Biostudies, Kyoto University, Kyoto 606-8507, Japan; <sup>6</sup>Research Center for Dynamic

13 Living Systems, Graduate School of Biostudies, Kyoto University, Kyoto 606-8507, Japan; <sup>7</sup>Institute

14 for Frontier Life and Medical Sciences, Kyoto University, Kyoto 606-8507, Japan; <sup>8</sup>Precursory

15 Research for Embryonic Science and Technology (PRESTO), Japan Science and Technology Agency,

16 Kyoto, Kyoto 606-8507, Japan; <sup>9</sup>Lead contact.

17 \*Correspondence: [yokoyama.tatsushi.2w@kyoto-u.ac.jp](mailto:yokoyama.tatsushi.2w@kyoto-u.ac.jp) (T.Y.)

18 [sakamoto.masayuki.2e@kyoto-u.ac.jp](mailto:sakamoto.masayuki.2e@kyoto-u.ac.jp) (M.S.)

19 **SUMMARY**

20 cAMP is a pivotal second messenger regulated by various upstream pathways including  $\text{Ca}^{2+}$  and G  
21 protein-coupled receptors (GPCRs). To decipher *in vivo* cAMP dynamics, we rationally designed  
22 cAMPinG1, an ultrasensitive genetically encoded green cAMP indicator that outperformed its  
23 predecessors in both dynamic range and cAMP affinity. Two-photon cAMPinG1 imaging detected  
24 cAMP transients in the somata and dendritic spines of neurons in the mouse visual cortex on the order  
25 of tens of seconds. In addition, multicolor imaging with a highly sensitive new red  $\text{Ca}^{2+}$  indicator  
26 RCaMP3 allowed simultaneous measurement of population patterns in  $\text{Ca}^{2+}$  and cAMP in hundreds  
27 of neurons. We identified  $\text{Ca}^{2+}$ -induced cAMP responses that represented specific information, such  
28 as direction selectivity in vision and locomotion, as well as GPCR-induced cAMP responses. Overall,  
29 our multicolor suite revealed that information encoded in  $\text{Ca}^{2+}$  and GPCRs signaling is integrated and  
30 stored as cAMP transients for longer periods *in vivo*.

31 **Highlights**

32 • Developing an ultrasensitive cAMP indicator, cAMPinG1, for visualizing cAMP transients in somata  
33 and dendritic spines *in vivo*.

34 • Developing a highly sensitive red Ca<sup>2+</sup> indicator, RCaMP3, for visualizing Ca<sup>2+</sup> transients in large  
35 neuronal population.

36 • Dual-color Ca<sup>2+</sup> and cAMP imaging for dissecting Ca<sup>2+</sup>-induced and GPCR-induced cAMP  
37 responses.

38 • Single-cell, single-timepoint cAMP imaging for GPCR biology and drug screening.

39

40 **Keywords**

41 Genetically encoded cAMP indicator; genetically encoded Ca<sup>2+</sup> indicator; *In vivo* two-photon imaging;

42 Fiber photometry; Multicolor imaging; GPCR biology; Drug screening

## 43 INTRODUCTION

44 Cyclic adenosine monophosphate (cAMP) is a pivotal second messenger that plays a  
45 universal role in intracellular signal transduction in a variety of cell types and organisms. Individual  
46 cell types express various adenylate cyclases (ACs) and phosphodiesterases (PDEs) that synthesize  
47 and degrade cAMP, respectively. The upstream regulators of the ACs are generally G protein-coupled  
48 receptors (GPCRs), which increase or decrease intracellular cAMP in a cell-type-specific manner.  
49 Some cell types, including neurons, also express ACs that are dependent on another central second  
50 messenger,  $\text{Ca}^{2+}$  (Kandel et al., 2014). The regulation of cAMP by these multiple upstream signaling  
51 pathways occurs continuously in the soma and small cellular compartments, such as dendritic spines  
52 and axonal boutons, modulating diverse cellular functions through cAMP-dependent kinases, channels,  
53 and transcription factors. Despite extensive knowledge of cAMP functions as a second messenger, the  
54 precise timing and location of its regulatory effects *in vivo* are still unknown. Therefore, technologies  
55 to visualize the spatiotemporal dynamics of cAMP *in vivo* are crucial for biological research in various  
56 organs or species.

57 Since cAMP was first visualized in 1991, more than 50 cAMP indicators have been developed  
58 (Adams et al., 1991; Massengill et al., 2021). The circularly permuted green fluorescent protein  
59 (cpGFP)-type cAMP indicators have been intensively developed more recently due to their large  
60 dynamic range (Kawata et al., 2022; Liu et al., 2022; Wang et al., 2022). However, the use of these



61 indicators has been limited because they have low cAMP affinity ( $> 1 \mu\text{M}$ ). Since the cAMP affinity  
62 of endogenous cAMP-dependent kinases and channels is typically in the hundreds of nanomolar range  
63 (Ludwig et al., 1998; Zhang et al., 2012), it is critical to have a submicromolar affinity to detect  
64 bidirectional cAMP change *in vivo*. Due to the lack of cAMP indicators with both large dynamic range  
65 and submicromolar cAMP affinity, the basic properties of *in vivo* cAMP dynamics remain unclear.  
66 Specifically, the following questions have not been answered: (1) What is the time scale of cAMP  
67 dynamics in individual cells and subcellular compartments? (2) What information is encoded in the  
68 cAMP population pattern? (3) How do multiple upstream signals, such as neuromodulators, GPCRs,  
69 and  $\text{Ca}^{2+}$ , influence the population pattern of cAMP change?

70         Here, we present cAMPinG1, a green cAMP indicator with a significantly larger dynamic  
71 range and more than 4.8-fold higher cAMP affinity than the existing green cAMP indicators. *In vivo*  
72 cAMP imaging with cellular and subcellular resolution revealed that cAMP transients occurred on the  
73 temporal scale of seconds to tens of seconds. We also introduce RCaMP3, an improved red calcium  
74 indicator. Dual-color imaging for  $\text{Ca}^{2+}$  and cAMP revealed that cell-specific cAMP transients  
75 represented specific information as a downstream of  $\text{Ca}^{2+}$  signaling as well as GPCR-induced cAMP  
76 responses. In addition, the combination of cAMPinG1 and red-shifted channelrhodopsin (ChRmine)  
77 revealed that action potentials are sufficient to induce cAMP transients *in vivo*. Overall, our multicolor  
78 suite for  $\text{Ca}^{2+}$  and cAMP imaging allows us to examine how the information encoded in action

79 potentials, Ca<sup>2+</sup>, and GPCR signaling is integrated and stored for a longer timescale as cAMP transients.

80 We also demonstrated the application of cAMPinG1 imaging in cultured cells for GPCR biology and

81 drug screening.

82

## 83 **RESULTS**

### 84 **Rational engineering of an ultrasensitive cAMP sensor**

85 To develop a high affinity cAMP sensor, we chose a mammalian protein kinase A regulatory

86 subunit (PKA-R) as the cAMP sensing domain. PKA-Rs are widely distributed and functional in

87 mammalian neurons even when tagged by GFP and overexpressed (Zhong et al., 2009) and have been

88 well characterized in terms of their biochemical, evolutionary, and structural properties (Canaves and

89 Taylor, 2002; Kim et al., 2007; Su et al., 1995; Zhang et al., 2012). We used the cAMP-binding domain

90 A of mammalian PKA-R type 1 $\alpha$  (PKA-R1 $\alpha$ ) because of its high affinity for cAMP (around 150 nM)

91 (Lorenz et al., 2017), which is within the range of the affinity of cAMP-binding domains in multiple

92 PKAs and cyclic nucleotide-gated ion channels (Ludwig et al., 1998; Zhang et al., 2012) (**Figure S1A**).

93 We then inserted cpGFP into the  $\beta$ 4 –  $\beta$ 5 loop of PKA-R1 $\alpha$  for the following reasons: (1) it is close to

94 cAMP in the cAMP-bound three-dimensional structure, (2) it is exposed on the surface, and (3) it is

95 structurally flexible, as demonstrated by the analyses of crystallization and evolutionarily conserved

96 sequences (Canaves and Taylor, 2002; Wu et al., 2004) (**Figure 1A; Figures S1B and S1C**). The

97 structural flexibility of loops was critical to avoid possible structural perturbations that could decrease  
98 the affinity (Dagliyan et al., 2016). In addition, we removed the N-terminal PKA-R1 $\alpha$  region, which  
99 includes a dimerization/docking domain interacting with scaffold proteins and an inhibitory domain  
100 interacting with PKA catalytic subunits (PKA-C), to avoid interaction with these endogenous proteins.  
101 Instead, we fused the RSET sequence to the N-terminus of the sensor to promote stable expression  
102 (Wu et al., 2004). To develop this construct with larger  $\Delta F/F$ , we then generated a library of over 250  
103 mutants with mutations on the putative interface between the cpGFP and cAMP-binding domain,  
104 including two linkers and residues in cpGFP close to the interface, and screened them in *Escherichia*  
105 *coli* (*E. coli*). The variant with the largest fluorescence response to cAMP was named cAMPinG1  
106 (cAMP indicator Green 1) (**Figure 1B**). Biophysical characterization showed that cAMP-free  
107 cAMPinG1 had a dominant excitation peak at 400 nm and a second peak at 516 nm, while cAMP-  
108 saturated cAMPinG1 had a dominant excitation peak at 498 nm (**Figure 1C**). The green fluorescence  
109 intensity of cAMPinG1 increased by 1,000 % upon binding to cAMP with blue light (488 nm), while  
110 the green fluorescence intensity decreased by 61 % with violet light (405 nm), resulting in a 2,700 %  
111 ratio change with a combination of blue and violet excitation in HEK293T cell lysate. The large ratio  
112 change dependent on the decrease of fluorescence intensity with violet excitation indicates that  
113 cAMPinG1 is suitable for ratiometric imaging, in contrast to some cpGFP-type indicators such as  
114 GCaMPs and G-Flamp1, which do not show a fluorescence decrease with violet excitation (Inoue et

115 al., 2019; Wang et al., 2022) (**Figure S2A**).

116 We next developed a cAMP-insensitive indicator (cAMPinG1mut) by introducing R211E (in  
117 the numbering of mouse PKA-R1 $\alpha$ ) mutation to block cAMP binding (**Figure 1D**). cAMPinG1 is  
118 distributed throughout the cell, including the nucleus and cytoplasm, considerably affecting signal  
119 detection. To detect cAMP changes selectively in the cytoplasm, we added a self-cleaving peptide  
120 (F2A), known to work as a nuclear export signal (Ohkura et al., 2012), to the C-termini of cAMPinG1  
121 (named cAMPinG1-NE) (**Figure 1D**). Furthermore, to avoid contamination of somatic neuropil  
122 fluorescence signals, we linked ribosomal subunit protein (RPL10) to the C-terminal of cAMPinG1  
123 as soma targeting (named AMPinG1-ST) (Chen et al., 2020) (**Figure 1D**).

124

### 125 ***In vitro* characterization of cAMPinG1**

126 We next investigated side by side several recently developed cpGFP-type cAMP sensors. The  
127 comparative evaluation revealed that cAMPinG1 had the largest dynamic range ( $\Delta F/F$ ) and  
128 fluorescence intensity in a cAMP-saturated state in HEK293T cell lysate than the existing cAMP  
129 sensors, Flamindo2, gCarvi, and G-Flamp1 (Hackley et al., 2018; Kawata et al., 2022; Odaka et al.,  
130 2014) (**Figure 1E; Figure S2B; Table S1**). cAMPinG1mut did not respond to cAMP, indicating that  
131 the fluorescence change depends on cAMP binding. We then compared the cAMP affinities of these  
132 sensors. The concentration-response curve showed that the  $K_d$  value of cAMPinG1 was 181 nM, less

133 than a quarter of those of Flamindo2, gCarvi, and G-Flamp1 (**Figures 1F and 1G**). Furthermore, the  
134 cAMP binding to cAMPinG1 was accompanied by Hill coefficients close to 1, indicating the linear  
135 relation of cAMP concentration and cAMPinG1 fluorescent intensity (**Figure 1H**). cAMPinG1  
136 showed lower affinity to cyclic guanosine monophosphate (cGMP) ( $K_d = 12 \mu\text{M}$ ), 60-fold larger than  
137 the cAMP  $K_d$  value of cAMPinG1, indicating cAMPinG1 fluorescence change was specific for cAMP  
138 (**Figure S2C**).

139 To further demonstrate the sensitivity in live cell imaging, we transiently expressed  
140 cAMPinG1 in HEK293T cells by lipofection and performed time-lapse imaging. We applied forskolin,  
141 an activator of ACs, to generate a high level of cAMP and assess the maximum fluorescence change.  
142 As previously shown (**Figure 1C**), cAMPinG1 is capable of ratiometric imaging by using alternating  
143 blue (488 nm) and violet (405 nm) excitation, which can reduce motion artifacts, sensor concentration  
144 changes, and ambient light. As expected, the fluorescence intensity increased with 488 nm excitation  
145 and decreased with 405 nm excitation in response to the stimulus. While cAMPinG1 had high  $\Delta F/F$   
146 ( $\sim 400\%$ ) enough for intensimetric measurement with 488 nm excitation, ratiometric measurement  
147 had even higher  $\Delta F/F$  ( $\sim 800\%$ ). We also found that cAMPinG1 binding to PKA-C was undetectable  
148 (**Figure S2D**). The elevation of cAMPinG1 fluorescence by forskolin administration was also  
149 observed in neurons in acute brain slices (**Figure S3**).

150

151 ***In vivo* two-photon imaging of cAMP dynamics with subcellular resolution**

152 To demonstrate *in vivo* functionality of cAMPinG1, we introduced cAMPinG1 or inactive  
153 cAMPinG1mut into pyramidal neurons in layer 2/3 (L2/3) of the mouse primary visual cortex (V1) by  
154 *in utero* electroporation (**Figure 2A**). We applied an aversive airpuff stimulus in the awake condition  
155 to induce an elevation of noradrenaline and cAMP in the cortex (Oe et al., 2020). Somatic cAMPinG1  
156 imaging visualized cAMP transients induced by 20 seconds of airpuff with single-cell resolution  
157 (**Figures 2B-2E**). Inactive cAMPinG1mut imaging did not show a fluorescence change in response  
158 to airpuff, indicating cAMPinG1 fluorescence change was dependent on cAMP binding to cAMPinG1  
159 *in vivo* (**Figures 2D and 2E**). The half-decay time of the cAMP transients was around 20 seconds, in  
160 contrast to the Ca<sup>2+</sup> transients on the order of hundreds of milliseconds (**Figure 2F**).

161 To further demonstrate the utility of cAMPinG1 indicators for cellular compartments, we  
162 expressed cAMPinG1-NE by *in utero* electroporation and imaged cAMP signals in dendritic spines  
163 and shafts *in vivo* under lightly anesthetized conditions (**Figure 2G**). We observed robust sensory-  
164 evoked cAMP transients in both dendritic spines and shafts (**Figures 2H and 2I**). These results show  
165 the feasibility of cAMPinG1 for *in vivo* imaging at both cellular and subcellular resolutions.

166

167 **Engineering and characterization of improved red Ca<sup>2+</sup> indicator RCaMP3**

168 Ca<sup>2+</sup> is one of the most important intracellular signaling molecule that play a crucial role in

169 regulating various physiological functions in neurons. However, the relationship between  $\text{Ca}^{2+}$  and  
170 cAMP remains poorly understood. To shed light on this relationship, it is essential to measure the  
171 dynamics of  $\text{Ca}^{2+}$  and cAMP simultaneously. For combinational use with the green cAMP indicator  
172 *in vivo*, we developed a new red  $\text{Ca}^{2+}$  indicator. Since the first circularly permuted red fluorescent  
173 protein (cpRFP)-type  $\text{Ca}^{2+}$  indicator, R-GECO1, was reported, a series of red  $\text{Ca}^{2+}$  indicators based on  
174 R-GECO1 have been developed (Dana et al., 2016; Inoue et al., 2015; Inoue et al., 2019; Ohkura et  
175 al., 2012; Wu et al., 2013; Zhao et al., 2011) (**Figure S4A**). We introduced several mutations from the  
176 existing  $\text{Ca}^{2+}$  indicators into jRGECO1a and termed this new hybrid design of the red calcium  
177 indicator RCaMP3 (**Figure 3A**).

178 *In vitro* characterization revealed that RCaMP3 had a larger dynamic range and more blue-  
179 shifted excitation spectra compared to jRGECO1a and XCaMP-R, two of the best red calcium  
180 indicators for *in vivo* two-photon imaging (**Figure 3B**; **Figures S4B-S4F**). In addition, RCaMP3  
181 exhibited a similar  $\text{Ca}^{2+}$  sensitivity and Hill coefficient to jRGECO1a (**Figures S4G-S4H**). Some of  
182 the most commercially available two-photon lasers are equipped with fixed around 1,040 nm for  
183 excitation of red fluorophores though the two-photon spectral peak of jRGECO1a and XCaMP-R is  
184 longer than 1,040 nm (Inoue et al., 2019). When excited at 1,040 nm, RCaMP3 showed a significant  
185 increase in fluorescence over jRGECO1a in the  $\text{Ca}^{2+}$ -saturated state (**Figure 3C**). Therefore, the  
186 enhanced dynamic range and blue-shifted excitation spectrum of RCaMP3 make it particularly well-

187 suited for two-photon imaging using the commonly available 1,040 nm lasers.

188           Next, we tested the performance of RCaMP3 in acute brain slices of L2/3 barrel cortex  
189 pyramidal neurons introduced by adeno-associated virus (AAV). Spike-induced calcium transients  
190 were assessed by one-photon imaging under a whole-cell patch-clamp configuration (**Figure 3D**). We  
191 found that RCaMP3 had larger responses to single action potentials than jRGECO1a in response, while  
192 their rise and decay kinetics were comparable (**Figures 3E-3H**). In addition, we performed loose-seal  
193 cell-attached electrical recording and two-photon  $\text{Ca}^{2+}$  imaging simultaneously *in vivo* (**Figure 3I**).  
194 RCaMP3 reliably detected  $\text{Ca}^{2+}$  transients preceded by single APs (**Figure 3J**). These results indicate  
195 that RCaMP3 is superior to the existing red  $\text{Ca}^{2+}$  indicators in detecting spike-induced calcium  
196 transients with single cell resolution.

197           We then tested the performance of RCaMP3 in *in vivo* two-photon mesoscale imaging using  
198 fast-scanning high optical invariant two-photon microscopy (FASHIO-2PM) (Ota et al., 2021). We  
199 performed RCaMP3 imaging in large field-of-view ( $3.0 \times 3.0 \text{ mm}^2$ ) including the primary  
200 somatosensory cortices by 1,040 nm excitation (**Figure 3K; Movie S1**). Somatic  $\text{Ca}^{2+}$  transients of  
201 several thousands of L5 neurons were simultaneously monitored with single-cell resolution (**Figure 3L**).  
202 In addition, somatic  $\text{Ca}^{2+}$  transients of L2/3 neurons and dendritic  $\text{Ca}^{2+}$  transients of L5 neurons could  
203 be monitored when imaged in L2/3 (**Figure S5**). These results demonstrate the high sensitivity of  
204 RCaMP3 which enables  $\text{Ca}^{2+}$  imaging large sets of deep cortical neurons.



205

206 **Dual-color imaging for Ca<sup>2+</sup> and cAMP during forced running**

207 Next, to image the Ca<sup>2+</sup> and cAMP dynamics with single-cell resolution *in vivo*, we co-

208 expressed RCaMP3 and cAMPinG1-ST in L2/3 neurons of the V1 by AAV injection (**Figure 4A**).

209 Using a piezo objective scanner, we performed multiple z-plane imaging of head-fixed awake mice

210 (**Figure 4B**). cAMPinG1-ST and RCaMP3 were excited with 940 nm and 1,040 nm, respectively.

211 Consistent with the previous report, cAMPinG1-ST fluorescence was localized somata due to the

212 soma-targeting signal RPL10 (Chen et al., 2020), which reduced contamination of neuropil

213 fluorescence and enabled accurate tracking of individual cAMP changes. Here, we simultaneously

214 visualized Ca<sup>2+</sup> and cAMP signals of more than 400 neurons in L2/3 of a mouse (**Figures 4C and 4D**;

215 **Movie S2**). During the imaging, we employed a forced running task, which was reported to increase

216 neuromodulators, including noradrenaline, cAMP, and PKA activities in the cortex (Ma et al., 2018;

217 Massengill et al., 2022; Wang et al., 2022). The majority of neurons showed an increase in cAMP

218 signals during running (**Figures 4D and 4E**). This global cAMP increase was less cell-specific,

219 possibly due to neuromodulators such as noradrenaline (Massengill et al., 2022; Reimer et al., 2016).

220 Consistent with the previous report (Stringer et al., 2019), some parts of cells showed calcium

221 transients during running, detected by RCaMP3 (**Figures 4D and 4E**). Interestingly, these motion-

222 related cells had larger cAMP transients than the other non-motion-related cells (**Figures 4F-4H**). This

223 additional cAMP elevation with  $\text{Ca}^{2+}$  responses may be attributed to  $\text{Ca}^{2+}$ -dependent ACs. These  
224 results suggest that our multicolor imaging can detect  $\text{Ca}^{2+}$  and cAMP signals separately, and that  
225 cAMP signals can integrate information encoded in multiple upstream neuromodulators and  $\text{Ca}^{2+}$ .

226 To demonstrate the application of cAMPinG1 and RCaMP3 for other cell types than neurons,  
227 we expressed RCaMP3 and cAMPinG1-NE in astrocytes in L2/3 of the V1 by viral delivery of them  
228 under the control of the GFAP promoter, which introduced specific expression in astrocytes (Lee et  
229 al., 2006). Again, forced running-induced  $\text{Ca}^{2+}$  increase followed by a cAMP increase (**Figure S6**).

230

### 231 **Dual-color imaging for $\text{Ca}^{2+}$ and cAMP during visual stimulation**

232 To further investigate the relationship between  $\text{Ca}^{2+}$  and cAMP *in vivo*, a drifting grating  
233 stimulus of 8 directions was applied to induce cell-specific  $\text{Ca}^{2+}$  transients in L2/3 neurons of the V1  
234 (**Figure 5A**). *In vivo* two-photon imaging revealed that RCaMP3 showed direction-selective  $\text{Ca}^{2+}$   
235 transients in response to 4 seconds of drifting gratings, consistent with previous studies (Chen et al.,  
236 2013; Dana et al., 2016; Sakamoto et al., 2022a) (**Figures 5B-5D; Figure S7**). Interestingly,  
237 cAMPinG1-ST also showed direction-selective cAMP transients preceded by  $\text{Ca}^{2+}$  transients, which  
238 were selective to the same direction (**Figures 5B-5D; Figure S7**). These data suggest that as well as  
239 forced running, visual stimuli also induced cAMP increase preceded by  $\text{Ca}^{2+}$  transients.

240 To explore cAMP changes in response to visual stimuli in more detail, we conducted an

241 experiment with repetitive moving grating of the same direction (8 seconds, 3 times). Neurons  
242 responding to the direction in  $\text{Ca}^{2+}$  levels exhibited cAMP increase, as observed above (**Figures 5E-**  
243 **5G**). Surprisingly, we observed that cAMPinG1-ST fluorescence began to decrease in majority of  
244  $\text{Ca}^{2+}$ -responsive and unresponsive cells in the middle of visual stimuli. This global cAMP decrease,  
245 lasted beyond the end of stimulus and lowered cAMPinG1 fluorescence than the baseline observed  
246 before the stimulation (**Figures 5E-5G**). This phenomenon was not observed during forced running,  
247 potentially due to differences in the neuromodulators, GPCRs and PDEs activated by these physical  
248 stimuli. Overall, dual-color  $\text{Ca}^{2+}$  and cAMP imaging during visual stimuli visualized cAMP levels  
249 modulated bidirectionally by multiple upstream *in vivo*.

250

### 251 **Action potentials are sufficient to induce somatic cAMP elevation**

252 To determine whether the calcium-related cAMP increase detected above depended on  $\text{Ca}^{2+}$   
253 influx induced by action potentials, we applied single-cell optogenetic stimulation and cAMP imaging  
254 *in vivo*. To achieve spatially precise optical stimulation to the soma of a neuron, we sparsely expressed  
255 cAMPinG1-NE and soma-targeted ChRmine in L2/3 neurons of the V1 by utilizing Cre/loxP  
256 recombination system (Druckmann et al., 2013; Marshel et al., 2019) (**Figures 5H and 5I**). Since  
257 ChRmine is a red-shifted cation-conducting channelrhodopsin that is selective to monovalent cations,  
258 its use allows for ruling out the effect of  $\text{Ca}^{2+}$  influx through the rhodopsin on  $\text{Ca}^{2+}$ -dependent cAMP

259 changes (Kishi et al., 2022). We observed a robust increase in cAMP levels in response to two-photon  
260 single-cell stimulation at 1,040 nm (**Figure 5J**). This cAMP increase is necessary for both the  
261 expression of ChRmine and photostimulation, meaning that the spike-induced cAMP increase can be  
262 mediated by voltage-dependent  $\text{Ca}^{2+}$  channels and  $\text{Ca}^{2+}$ -dependent ACs (**Figure 5K**). These data  
263 indicate that action potentials are sufficient to induce an increase in somatic cAMP level through the  
264  $\text{Ca}^{2+}$  signaling pathway.

265

#### 266 **Dual-color fiber photometry for $\text{Ca}^{2+}$ and cAMP**

267 Having demonstrated the superior performance of cAMPinG1 and RCaMP3 by *in vivo* two-  
268 photon imaging, we next evaluated their potential use in single photon fiber photometry in deep brain  
269 areas. We injected AAVs encoding RCaMP3 and cAMPinG1-NE into the dorsal striatum (dStr)  
270 (**Figure 6A**). Since the neural activity of the dStr is associated with body movements (Parker et al.,  
271 2018), we performed the dual-color fiber photometry to measure  $\text{Ca}^{2+}$  and cAMP levels during a forced  
272 running task. For dual-color imaging, we employed different excitation wavelengths: 560 nm for  
273 RCaMP3 imaging and 405 nm and 470 nm for cAMPinG1 ratiometric imaging. In line with previous  
274 studies (Massengill et al., 2022; Wang et al., 2022), we observed an increase in cAMP levels during  
275 the running period following the increase in  $\text{Ca}^{2+}$  levels (**Figures 6B-6D**). Surprisingly, cAMP levels  
276 decreased after the running period and remained low for tens of seconds. In addition, we found that

277 cAMPinG1mut-NE did not show clear fluorescent change during and after the running task (**Figures**  
278 **6B-6D**). These data indicate that dual-color fiber photometry using RCaMP3 and cAMPinG1-NE can  
279 detect bulk Ca<sup>2+</sup> increase and bidirectional cAMP changes in deep brain regions.

280

### 281 **Single-cell, single-timepoint cAMPinG1 imaging for GPCR biology and drug screening**

282 Finally, to demonstrate the utility of cAMPinG1 for cAMP quantification in GPCR biology  
283 and drug screening, we generated a stable cell line of HEK293T cells that express cAMPinG1. Single-  
284 cell cloning of the stable cell lines resulted in the homogenous expression levels of cAMPinG1 among  
285 all cells. The proliferation rate of the cAMPinG1 stable cell line was comparable with the original  
286 HEK293T cell line, indicating the undetectable toxicity of cAMPinG1 expression (**Figures S8A and**  
287 **S8B**). As previously shown (**Figures 1C and 1I-1K**), cAMPinG1 is more suitable for ratiometric  
288 imaging compared to other cpGFP-based cAMP indicators. Therefore, we performed ratiometric  
289 imaging using the cAMPinG1 stable cell line. After applying forskolin, we found that the 488 ex / 405  
290 ex ratio in each cell was higher in forskolin-stimulated cells than in non-stimulated cells (**Figure S8C**).  
291 This result shows that ratiometric cAMPinG1 imaging can be utilized to quantify cAMP levels without  
292 the need for time-lapse imaging, simply comparing the 488 ex / 405 ex ratio at a specific point in time  
293 before and after drug administration with cellular resolution. We referred to this method as “single-  
294 timepoint cAMPinG1 imaging.”

295 To demonstrate the utility of single-timepoint cAMPinG1 imaging for GPCR biology, we  
296 transiently expressed a dopamine receptor D1 (DRD1), a Gs-coupling GPCR known for its  
297 constitutive activity in the cAMP pathway, in the cAMPinG1 stable cell line (**Figure 7A**). We fused a  
298 self-cleaving 2A peptide (P2A) and RFP to DRD1 to monitor the expression level of DRD1 in each  
299 cell. We also used a tetracycline-inducible expression system to minimize the effect of GPCR  
300 expression on cell proliferation or toxicity. Single-cell, single-timepoint ratiometric imaging with  
301 cAMPinG1 revealed a positive correlation between DRD1 expression and cAMP level (Wang et al.,  
302 2020) (**Figures 7A and 7B**). Consistent with previous reports (Lin et al., 2020; Wang et al., 2020), we  
303 also observed high cAMP levels due to the constitutive activity of the GPCR GPR52 (**Figure 7E**).  
304 These results suggest that single-timepoint cAMPinG1 imaging can be available to compare the  
305 constitutive activity of cAMP-related GPCRs. In addition to measuring constitutive activities, single-  
306 timepoint cAMPinG1 imaging also allowed quantifying the agonist activity of a Gi-coupling  
307 dopamine receptor D2 (DRD2) as well as that of DRD1 with cellular resolution (**Figures 7C and 7D**,  
308 **7F**). Furthermore, to demonstrate the utility of cAMPinG1 imaging for detecting the inverse agonist  
309 activity, which reduces the constitutive activity of GPCRs, we used a Gs-coupling serotonin receptor  
310 HTR6. The activity of inverse agonist clozapine was detected as well as the agonist activity of  
311 serotonin (**Figure 7F**). These data demonstrate the utility of single-timepoint cAMPinG1 imaging for  
312 GPCR biology and pharmacology.

313 To further demonstrate the utility of single-timepoint imaging as a method for drug screening,  
314 we established triple stable cell lines expressing cAMPinG1, a GPCR, and a marker fluorescent protein.  
315 We used DRD1 and melanocortin 3 receptor (MC3R) as representative Gs-coupling GPCRs. We  
316 mixed DRD1-RFP expressing cells and MC3R-iRFP expressing cells to image the responsiveness of  
317 each GPCR simultaneously (**Figure 7G**). Single-timepoint cAMPinG1 imaging revealed that DRD1  
318 and MC3R specifically responded to their respective agonist (dopamine and ACTH, respectively)  
319 (**Figure 7H**). These results suggest that single-timepoint cAMPinG1 imaging has the potential for  
320 multiplex high-throughput drug screenings, allowing for the simultaneous evaluation of multiple  
321 GPCRs and exclusion of compound candidates that increase cAMP levels in multiple GPCR cell lines  
322 and produce non-specific responses.

323

## 324 **DISCUSSION**

### 325 **Engineering of cAMPinG1 and RCaMP3**

326 In this study, we report the engineering of cAMPinG1, an ultrasensitive cAMP indicator with  
327 high affinity for cAMP and a large dynamic range. The sensitivity was enough to quantify cAMP  
328 transient in both somata and dendritic spines in the mouse cortex. In addition, by combining  
329 cAMPinG1 with RCaMP3, we visualized the population dynamics of cAMP and Ca<sup>2+</sup> simultaneously  
330 in hundreds of cells with cellular resolution *in vivo*. We also conducted proof-of-concept experiments

331 of cAMPinG1 imaging for GPCR biology and drug screening.

332           Although several cAMP sensors have been developed recently, each had some drawbacks for  
333 *in vivo* imaging (Massengill et al., 2022; Wang et al., 2022). Due to its low cAMP affinity, G-Flamp1  
334 limited the number of cells that could be imaged and quantified cAMP dynamics in the mouse cortex.  
335 cAMPFIREs were applied for two-photon fluorescence lifetime imaging microscopy (FLIM), which  
336 made fast imaging or combined use with other sensors, such as Ca<sup>2+</sup> indicators, generally challenging  
337 due to the required optical settings. In addition, the full-length cAMPFIREs cDNA (approximately 4.5  
338 kb) is too large to be packaged into a AAV vector, limiting on the methods for *in vivo* delivery. Our  
339 new indicators (about 1.7 kb) with high sensitivity addressed these issues. To the best of our knowledge,  
340 this is the first study to visualize population dynamics of Ca<sup>2+</sup> and cAMP simultaneously in hundreds  
341 of cells in the mouse cortex, demonstrating a robust positive correlation between Ca<sup>2+</sup> and cAMP.

342           Red Ca<sup>2+</sup> indicators are indispensable for multicolor imaging with a green indicator to reveal  
343 the interaction between the target molecule of the green indicator and neural activity or Ca<sup>2+</sup> signaling.  
344 Despite tremendous efforts to improve the sensitivity of red calcium indicators (Dana et al., 2016;  
345 Fenno et al., 2020; Inoue et al., 2015; Inoue et al., 2019; Ohkura et al., 2012; Wu et al., 2013; Zhao et  
346 al., 2011), the application of red Ca<sup>2+</sup> indicators is still limited due to their sensitivity *in vivo*. In this  
347 study, we developed a highly sensitive RCaMP3, which expands the application of red Ca<sup>2+</sup> indicators  
348 for two-photon mesoscale imaging. Moreover, multicolor imaging of RCaMP3 and cAMPinG1-ST



349 revealed the interaction of  $\text{Ca}^{2+}$  and cAMP at the population level. Therefore, RCaMP3 will contribute  
350 to further multicolor imaging, especially with recently developed green indicators (Duffet et al., 2022;  
351 Fenno et al., 2020; Ino et al., 2022; Unger et al., 2020).

352

### 353 **Population coding in $\text{Ca}^{2+}$ and cAMP *in vivo***

354 *In vivo* imaging experiments showed bidirectional cAMP changes in response to various  
355 physiological stimuli. In the cortex, it is reported that noradrenaline is secreted in response to forced  
356 running or aversive stimuli such as airpuffs and activates Gs-coupling  $\beta 1$  adrenoceptors (Massengill  
357 et al., 2022; Oe et al., 2020; Reimer et al., 2016; Wang et al., 2022), which can explain the global  
358 cAMP increase observed in this study. On the contrary, there are multiple possibilities to explain the  
359 mechanisms of the global cAMP decrease observed during and after stimulations in the cortex and  
360 dorsal striatum, including some Gi-coupling GPCRs, such as GABA<sub>B</sub> receptors, acetylcholine  
361 receptors, and adrenergic receptors, or PDEs activated by  $\text{Ca}^{2+}$  or kinases (Omori and Kotera, 2007).  
362 Furthermore, the detection of downward cAMP change indicates the baseline cAMPinG1 signal before  
363 stimulation reflects basal cAMP level, which is the sum of constitutive activities of expressed GPCRs  
364 and agonist activities of the extracellular ligands existing originally in the awake conditions. Thus, the  
365 cAMP affinity of cAMPinG1, on the order of several hundreds of nanomolar, is suitable for baseline  
366 cAMP level and bidirectional cAMP change *in vivo*. In addition, our results showed that the kinetics

367 of cAMP varied between the experiments, possibly due to the difference in serving GPCRs or  
368 expression properties of phosphodiesterase families in individual cell types or brain regions. Overall,  
369 the sensitivity of cAMPinG1 is suitable for visualizing bidirectional change and kinetics of cAMP in  
370 various cell types.

371 Two-photon dual-color imaging for  $\text{Ca}^{2+}$  and cAMP revealed a strong correlation between  
372 cell-specific cAMP increases and  $\text{Ca}^{2+}$  transients. Optogenetic experiments also showed that action  
373 potentials are sufficient to induce somatic cAMP transients *in vivo*. The spike-induced cAMP increase  
374 can be mediated by voltage-dependent  $\text{Ca}^{2+}$  channels and  $\text{Ca}^{2+}$ -dependent ACs. Thus, our results  
375 provide the first evidence that cAMP can encode specific information, such as direction selectivity in  
376 vision or locomotion encoded in action potentials and  $\text{Ca}^{2+}$  signaling (**Figure S9A**). This cell-specific  
377 cAMP elevation cooperated or competed with global cAMP increase or decrease, respectively, leading  
378 to the formation of population patterns of cAMP. These forms of population coding in cAMP highlight  
379 the importance of  $\text{Ca}^{2+}$  signaling as the upstream regulator of cAMP and PKA signaling, which is not  
380 fully understood due to technological limitations (Ma et al., 2022; Reimer et al., 2016; Tang and  
381 Yasuda, 2017). Notably, cAMP transients last for tens of seconds, much longer than the hundreds of  
382 milliseconds of  $\text{Ca}^{2+}$  transients. Therefore, information encoded in  $\text{Ca}^{2+}$  and GPCR signaling is  
383 integrated and stored for a longer period through cAMP transients (**Figure S9B**).

384

385 **cAMPinG1 imaging for GPCR biology and drug screening**

386           The human genome code about non-olfactory 300 GPCRs that are expressed throughout the  
387 body, and even small parts of GPCRs are related to one-third of all approved drugs, indicating the  
388 importance of studying GPCR biology and conducting drug screening targeting these receptors.  
389 Quantification of the constitutive activity of GPCRs is important because it has various roles *in vivo*  
390 (Iino et al., 2020; Wang et al., 2020). Moreover, the downstream pathway of orphan GPCRs, whose  
391 endogenous ligands are unknown, has been assessed by constitutive activity (Kroeze et al., 2015;  
392 Schihada et al., 2021). However, current technologies for measuring the constitutive activity of GPCRs  
393 have limitations, including the inability to cancel out the effects of GPCRs expression levels and cell  
394 proliferation rate. To overcome these limitations, we utilized a tetracycline-inducible expression  
395 system to minimize cell toxicity due to the expression of some GPCRs and single-cell, single-  
396 timepoint cAMPinG1 imaging to simultaneously assess cAMP levels and GPCRs-P2A-RFP  
397 expression levels. The single-cell analysis will also contribute to multiplex high-throughput screening,  
398 in which several GPCRs can be screened simultaneously combined with barcoding fluorescent  
399 proteins, helping to minimize false positives (Yang et al., 2021). Furthermore, our indicators can be  
400 used for inverse agonist screening due to their high sensitivity. Taken together, our brief and robust  
401 cAMP quantification technique has the strong potential to be valuable in GPCR biology and drug  
402 screening.

403

#### 404 **Limitations of the study**

405           Our results identified bidirectional cAMP change in the cortex and striatum, suggesting that  
406  $\text{Ca}^{2+}$  and noradrenaline signaling may be upstream of cAMP. However, the functional roles of these  
407 cAMP changes in the brain network are also unclear because cAMP has multiple downstream  
408 pathways, including PKA and cAMP-dependent channels. Further investigation is necessary to fully  
409 understand these processes. It will also be important to determine the cAMP dynamics in different cell  
410 types in other brain areas or body parts because expression patterns of GPCRs, PDEs, and ACs vary  
411 among cell types. Overall, our precise *in vivo* imaging of  $\text{Ca}^{2+}$  and cAMP imaging will contribute to a  
412 variety of scientific fields.

413           Our study quantified the constitutive activity of several representative Gs-coupling GPCRs.  
414 It will be necessary to determine the cAMP-mediated downstream pathways of GPCRs by cAMP  
415 indicators because there are some discrepancies between the results of receptor-G protein ‘couplome’  
416 obtained from different assays (Hauser et al., 2022). In addition, although GPCR signaling has several  
417 downstream pathways, such as IP3 and  $\beta$ -arrestin, our assay can only detect cAMP-related pathways.  
418 In the future, it will be important to develop more sensitive fluorescence indicators of these  
419 downstream molecules for GPCR biology and drug screening.

420 **METHODS**

421

422 **KEY RESOURCES TABLE**

| REAGENT or RESOURCE                                        | SOURCE                   | IDENTIFIER        |
|------------------------------------------------------------|--------------------------|-------------------|
| <b>Bacterial and virus strains</b>                         |                          |                   |
| AAV2/1-eSyn-cAMPinG1-NE                                    | This paper               | N/A               |
| AAV2/1-eSyn-cAMPinG1mut-NE                                 | This paper               | N/A               |
| AAV2/1-eSyn-cAMPinG1-ST                                    | This paper               | N/A               |
| AAV2/1-GFAP-cAMPinG1-NE                                    | This paper               | N/A               |
| AAV2/1-CAG-DIO-cAMPinG1-NE                                 | This paper               | N/A               |
| AAV2/1-eSyn-jRGECO1a                                       | Dana et al., 2016        | N/A               |
| AAV2/1-eSyn-RCaMP3                                         | This paper               | N/A               |
| AAV2/1-GFAP-RCaMP3                                         | This paper               | N/A               |
| AAV2/1-CAG-DIO-RCaMP3                                      | This paper               | N/A               |
| AAV2/1-hSyn-iCre                                           | Druckmann et al., 2014   | N/A               |
| AAVPHP.eB-pCaMKII-Cre                                      | This paper               | N/A               |
| AAV2/1-CAG-DIO-ChRmine-mScarlet-Kv2.1                      | Marshall et al., 2019    | N/A               |
| LV-CAG-cAMPinG1                                            | This paper               | N/A               |
| LV-TRE3G-DRD1-cHS4-EF1 $\alpha$ -TetOn3G-P2A-mCherry-NLSx3 | This paper               | N/A               |
| LV-TRE3G-MC3R-cHS4-EF1 $\alpha$ -TetOn3G-P2A-iRFP670       | This paper               | N/A               |
| <b>Chemicals, peptides, and recombinant proteins</b>       |                          |                   |
| cAMPinG1                                                   | This paper               | GenBank: xxxxxxxx |
| RCaMP3                                                     | This paper               | GenBank: xxxxxxxx |
| Cyclic adenosine monophosphate (cAMP)                      | Tokyo Chemical Industry  | Cat# A2381        |
| Cyclic guanosine monophosphate (cGMP)                      | Abcam                    | Cat# ab120805     |
| Forskolin                                                  | Nacalai                  | Cat# 16384-84     |
| Forskolin                                                  | Wako                     | Cat# 067-02191    |
| IBMX                                                       | Tocris                   | Cat# 3758         |
| Dopamine Hydrochloride                                     | Nacalai                  | Cat# 14212-71     |
| Clozapine                                                  | Cayman                   | Cat# 12059        |
| Adrenocorticotrophic hormone (ACTH)                        | AdooQ                    | Cat# AP3295       |
| Ionomycin (calcium salt)                                   | Cayman Chemical          | Cat# 11932        |
| <b>Critical commercial assays</b>                          |                          |                   |
| Calcium Calibration Buffer Kit#1                           | Thermo Fisher Scientific | Cat# C3008MP      |

|                                                  |                        |                     |
|--------------------------------------------------|------------------------|---------------------|
| SYBR qPCR: SYBR Premix Ex Taq (Tli RNase H Plus) | Clontech               | Cat# RR420          |
| NucleoBond Xtra Midi EF                          | MACHEREY-NAGEL         | Cat# 740420         |
| <b>Experimental models: cell lines</b>           |                        |                     |
| HEK293T                                          | ATCC                   | Cat# CRL-11268      |
| DH5 $\alpha$                                     | TOYOBO                 | Cat# DNA-903        |
| DH10B                                            | Invitrogen             | Cat# 18297010       |
| Stbl3                                            | Invitrogen             | Cat# C737303        |
| cAMPinG1 stable cell line                        | This paper             | N/A                 |
| cAMPinG1, DRD1 and mCherry-NLS stable cell line  | This paper             | N/A                 |
| cAMPinG1, MC3R and iRFP670 stable cell line      | This paper             | N/A                 |
| <b>Experimental models: organisms/strains</b>    |                        |                     |
| Mouse: ICR                                       | Japan SLC              | N/A                 |
| Mouse: C57BL/6N                                  | Japan SLC              | N/A                 |
| <b>Recombinant DNA</b>                           |                        |                     |
| pBAD-cAMPinG1                                    | This paper             | N/A                 |
| pCAG-cAMPinG1                                    | This paper             | RIKEN BRC: RDBxxxxx |
| pCAG-cAMPinG1mut                                 | This paper             | N/A                 |
| pCAG-cAMPinG1-NE                                 | This paper             | N/A                 |
| pCAG-cAMPinG1-ST                                 | This paper             | N/A                 |
| pCAG-Flamindo2                                   | Odaka et al., 2014     | N/A                 |
| pCAG-gCarvi                                      | Kawata et al., 2022    | N/A                 |
| pCAG-G-Flamp1                                    | Wang et al., 2022      | N/A                 |
| pCAG-jRGECO1a                                    | Dana et al., 2016      | N/A                 |
| pCAG-XCaMP-R                                     | Inoue et al., 2019     | N/A                 |
| pCAG-RCaMP3                                      | This paper             | N/A                 |
| pAAV-eSyn-cAMPinG1mut-NE                         | This paper             | N/A                 |
| pAAV-eSyn-cAMPinG1-NE                            | This paper             | RIKEN BRC: RDBxxxxx |
| pAAV-eSyn-cAMPinG1-ST                            | This paper             | RIKEN BRC: RDBxxxxx |
| pAAV-CAG-DIO-cAMPinG1-NE                         | This paper             | N/A                 |
| pAAV-gfaABC1D-cAMPinG1-NE                        | This paper             | N/A                 |
| pAAV-eSyn-jRGECO1a                               | Dana et al., 2016      | N/A                 |
| pAAV-eSyn-RCaMP3                                 | This paper             | RIKEN BRC: RDBxxxxx |
| pAAV-GFAP-RCaMP3                                 | This paper             | N/A                 |
| pAAV-CAG-DIO-RCaMP3                              | This paper             | N/A                 |
| pAAV-hSyn-iCre                                   | Druckmann et al., 2014 | N/A                 |

|                                                 |                      |                                                             |
|-------------------------------------------------|----------------------|-------------------------------------------------------------|
| pAAV-CaMKII-Cre                                 | This paper           | N/A                                                         |
| pAAV-CAG-DIO-ChRmine-mScarlet-Kv2.1             | Marshel et al., 2019 | N/A                                                         |
| pTRE-DRD1-P2A-mCherry-reverse-PGK-TetOn         | This paper           | N/A                                                         |
| pTRE-DRD2-P2A-mCherry-reverse-PGK-TetOn         | This paper           | N/A                                                         |
| pTRE-ARDB2-P2A-mCherry-reverse-PGK-TetOn        | This paper           | N/A                                                         |
| pTRE-GPR52-P2A-mCherry-reverse-PGK-TetOn        | This paper           | N/A                                                         |
| pTRE-HTR6-P2A-mCherry-reverse-PGK-TetOn         | This paper           | N/A                                                         |
| pTRE3G-DRD1-cHS4-EF1a-TetOn3G-P2A-mCherry-NLSx3 | This paper           | N/A                                                         |
| pTRE3G-MC3R-cHS4-EF1a-TetOn3G-P2A-iRFP670       | This paper           | N/A                                                         |
| pCMV- mouse PKAcat-linker-mCherry-CAAX          | This paper           | N/A                                                         |
| pCMV-mouse PKA-R1a-mEGFP                        | This paper           | N/A                                                         |
| pCMV-mCerulean                                  | This paper           | N/A                                                         |
| pUCmini-iCAP-PHP.eB                             | Chan et al., 2017    | Plasmid #103005                                             |
| <b>Software and algorithms</b>                  |                      |                                                             |
| ImageJ (Fiji 1.48)                              | NIH                  | <a href="http://Fiji.sc">http://Fiji.sc</a>                 |
| Python 3.8                                      |                      | <a href="https://www.python.org">https://www.python.org</a> |
| <b>Other</b>                                    |                      |                                                             |
| Multiplate reader                               | TECAN                | Spark                                                       |
| Confocal microscope                             | Carl Zeiss           | LSM880                                                      |
| Two-photon microscope                           | Olympus              | FVMPE-RS                                                    |
| FASHIO-2PM                                      | Ota et al., 2021     | N/A                                                         |
| Fiber photometry system                         | Doric                | FPS_1S_GCaMP + Red Fluo                                     |
| 400- $\mu$ m-diameter mono fiberoptic cannula   | Kyocera              | N/A                                                         |

423

## 424 RESOURCE AVAILABILITY

### 425 Lead contact

426 Further information and requests for resources and reagents should be directed to and will be fulfilled

427 by the lead contact, Masayuki Sakamoto ([sakamoto.masayuki.2e@kyoto-u.ac.jp](mailto:sakamoto.masayuki.2e@kyoto-u.ac.jp)).

428

429 **Materials availability**

430 The cAMPinG1 and RCaMP3 sequence is available from GenBank (accession number: xxxxxxxx  
431 (cAMPinG1), and xxxxxxxx (RCaMP3)). Plasmids generated in this study have been deposited to  
432 RIKEN BRC (catalog number: RDBxxxxx- xxxxx). These will be available after the publication.

433

| Catalog number | Plasmid name               |
|----------------|----------------------------|
| RDBxxxxx       | pN1-cAMPinG1               |
| RDBxxxxx       | pAAV-eSyn-cAMPinG1-NE-WPRE |
| RDBxxxxx       | pAAV-eSyn-cAMPinG1-ST-WPRE |
| RDBxxxxx       | pAAV-eSyn-RCaMP3-WPRE      |

434

435 **Data and code availability**

- 436 • All data reported in this paper will be shared by the lead contact upon request.
- 437 • This paper does not report original code.
- 438 • Any additional information required to reanalyze the data reported in this paper is available from  
439 the lead contact upon request.

440

441 **EXPERIMENTAL MODEL AND SUBJECTIVE DETAILS**

442 **Animals**



443 All animals were handled in accordance with the Kyoto University Guide, the University of  
444 Yamanashi Guide, the RIKEN guide, and the University of Tokyo Guide for the Care and Use of  
445 Laboratory Animals. Wild-type mice were group-housed and kept on a 12-h light/dark cycle with *ad*  
446 *libitum* food and water at room temperature. Wild-type animals used in this study were purchased from  
447 Japan SLC. Experiments were performed using male sex between 8 – 20 weeks of age.

448

#### 449 **Cell lines**

450 HEK293T cells were obtained from the American Type Culture Collection (CRL-11268).  
451 Cells were cultured in Dulbecco's Modified Eagle's Medium (DMEM) (Nacalai) supplemented with  
452 10% fetal bovine serum (FBS) (Sigma-Aldrich), 50 units/ml penicillin and 50 µg/ml streptomycin  
453 (Nacalai) at 37°C, 5% CO<sub>2</sub> in a humidified atmosphere. *E. coli* DH5α and DH10B, and Stbl3 cells  
454 were obtained from Toyobo (DNA-9303), Invitrogen (18297010), and Invitrogen (C737303),  
455 respectively. Bacteria were incubated in Lysogeny Broth medium supplemented with antibiotics at  
456 37°C.

457

## 458 **METHODS DETAILS**

### 459 **Plasmids**

460 To develop cAMP sensors, PKA-R1α (amino acids 108-186 and 190-381) was obtained

461 from a mouse cDNA library, and cpGFP and RSET domain were subcloned from GCaMP6f (Addgene  
462 plasmid # 52924). To enhance cytoplasmic localization of cAMPinG1, the F2A sequence of XCaMP-  
463 R was fused to the C-terminal of cAMPinG1 (Inoue et al., 2019). To develop soma-targeting  
464 cAMPinG1, the RPL10 domain was fused to the C-terminal of cAMPinG1 (Chen et al., 2020). For  
465 constructing RCaMP3, the cpRFP domain was synthesized (FragmentGENE, GENEWIZ), and RSET,  
466 M13, and CaM domains were obtained from jRGECO1a (Dana et al., 2016), F2A sequences were  
467 taken from XCaMP-R (Inoue et al., 2019). For site-directed mutagenesis, plasmid libraries were made  
468 using the inverse PCR method with PrimeSTAR Max DNA polymerase (Clontech), In-Fusion HD  
469 Cloning Kit (Clontech), and primers which included NNK codons, where K = G or T. For expression  
470 in *E. coli*, cAMP sensors were subcloned into a pBAD vector (Shen et al., 2018). For optogenetic  
471 stimulation, ChRmine-mScarlet-Kv2.1 was synthesized (FragmentGENE, GENEWIZ). For  
472 expression in HEK293T cells, Ca<sup>2+</sup> or cAMP sensors were subcloned into a plasmid encoding CAG  
473 promoter and woodchuck hepatitis virus post-transcriptional regulatory element (WPRE). For  
474 expression of GPCRs-P2A-mCherry in HEK293T cells, pTRE3G-HA signal-Flag-GPCRs-P2A-  
475 mCherry-reverse-PGK-TetOn3G was made of Tet-ON 3G inducible expression system (Clontech) and  
476 PRESTO-Tango GPCR Kit (Kroeze et al., 2015).

477 The GenBank accession numbers for the sequence are xxxxxxxx (cAMPinG1) and  
478 xxxxxxxx (RCaMP3). cAMPinG1 and RCaMP3 plasmids were deposited to the RIKEN BRC

479 (<https://dna.brc.riken.jp/en/>) for distribution following publication.

480

#### 481 ***In vitro* fluorometry for cAMP sensor screening**

482           The plasmids for bacterial expression of cAMP sensors were transformed into *E. coli* strain  
483 DH10B (Invitrogen). *E. coli* cells were plated and cultured at 37 °C on Lysogeny Broth (LB) agar  
484 plate with ampicillin and 0.0004% arabinose. Each colony was used to inoculate 1.5 ml of LB liquid  
485 medium with ampicillin and 0.2% arabinose and grown at 37 °C overnight. After centrifugation, cells  
486 were resuspended in 150 µl suspension buffer (20 mM MOPS (pH 7.2), 100 mM KCl, 1 mM DTT,  
487 cOmplete EDTA free (Sigma-Aldrich)), sonicated at 4 °C, and centrifuged. The supernatant was  
488 collected. For fluorometry, the supernatant was diluted 20-fold with the suspension buffer. The diluted  
489 supernatant was applied to 96-well plates. cAMP (Tokyo Chemical Industry) was added to a final  
490 concentration of 300 µM for cAMP-saturated conditions. Fluorometric measurements were performed  
491 on a Spark microplate reader (TECAN) at room temperature by measuring the fluorescence intensity  
492 at the excitation wavelength of 485 nm, an excitation bandwidth of 20 nm, an emission wavelength of  
493 535 nm, and an emission bandwidth of 20 nm.

494

#### 495 ***In vitro* cAMP fluorometry for HEK cell lysate**

496           HEK293T cells were incubated at 37 °C on 6-well plates with 2 ml DMEM and 10% FBS.

497 1  $\mu\text{g}$  DNA was transfected using X-tremeGENE HP DNA Transfection Reagent (Roche). Two days  
498 after the transfection, the cells were harvested to the 150  $\mu\text{l}$  suspension buffer described above,  
499 sonicated at 4  $^{\circ}\text{C}$ , and centrifuged. The supernatant was collected. For cAMP-saturated conditions, the  
500 supernatant was diluted 20-fold with suspension buffer, and cAMP was added to a final concentration  
501 of 300  $\mu\text{M}$ . Fluorometric measurements were performed at the excitation wavelength of 490 nm,  
502 excitation bandwidth of 20 nm, emission wavelength of 540 nm, and emission bandwidth of 20 nm.  
503 Excitation and emission spectra were taken at the emission wavelength of 555 nm and at the excitation  
504 wavelength of 460 nm, respectively. For measurement of cAMP affinity, the supernatant was diluted  
505 40-fold with suspension buffer to a final concentration of 0, 3, 10, 30, 100, 300, 1,000, 3,000, 10,000,  
506 30,000, 100,000, and 300,000 nM cAMP. For measurement of cGMP affinity, the supernatant was  
507 diluted 40-fold with suspension buffer to a final concentration of 0, 100, 300, 1,000, 3,000, 10,000,  
508 30,000, 100,000, 300,000, and 1,000,000 nM cGMP (Abcam). The  $K_d$  value and Hill coefficient were  
509 calculated by fitting according to the Hill equation.

510

#### 511 ***In vitro* Ca<sup>2+</sup> fluorometry for HEK cell lysate**

512 Cell incubation, transfection, and collection was performed as described above. For Ca<sup>2+</sup>-  
513 saturated or Ca<sup>2+</sup>-free conditions, the supernatant was diluted 20-fold with the Ca<sup>2+</sup>-EGTA buffer (30  
514 mM MOPS (pH 7.2), 100 mM KCl, 10 mM EGTA, 10 mM CaCl<sub>2</sub>, 1 mM DTT) or EGTA buffer (30

515 mM MOPS (pH 7.2), 100 mM KCl, 10 mM EGTA, 1 mM DTT), respectively. Fluorometric  
516 measurements were performed at the excitation wavelength of 560 nm, excitation bandwidth of 20 nm,  
517 emission wavelength of 610 nm, and emission bandwidth of 20 nm. Excitation and emission spectra  
518 were taken at the emission wavelength of 635 nm and at the excitation wavelength of 520 nm,  
519 respectively. For measurement of  $\text{Ca}^{2+}$  affinity, the supernatant was diluted 40-fold with a series of  
520 solutions with free  $\text{Ca}^{2+}$  concentration ranges from 0 nM to 3,900 nM (Zhao et al., 2011).

521

#### 522 **cAMP imaging in HEK293T cells**

523 HEK293T cells were incubated at 37 °C in 35 mm glass bottom dishes or 96-well glass  
524 bottom plates. 1 µg DNA encoding the sensors was transfected as described above. One day after the  
525 transfection, the culture medium was replaced with Tyrode solution (129 mM NaCl, 5 mM KCl, 30  
526 mM glucose, 25 mM HEPES-NaOH, pH 7.4, 2 mM  $\text{CaCl}_2$ , 2mM  $\text{MgCl}_2$ ). Imaging for cAMPinG1 was  
527 performed using LSM880 confocal microscope (Carl Zeiss). For time-lapse imaging, 405 nm and 488  
528 nm wavelength lasers were used for excitation in turns. Forskolin (Nacalai) was added to a final  
529 concentration of 50 µM. For tetracycline-dependent expression of GPCRs-P2A-mCherry, doxycycline  
530 was added to a final concentration of 100 ng/ml 3 hours before the imaging. For single time-point  
531 imaging, the culture medium was replaced with Tyrode solution with or without drugs 20 minutes  
532 before the imaging. 405 nm and 488 nm wavelength lasers were used for ratiometric cAMP imaging,

533 and 561 and 633 nm wavelength lasers was used for the visualization of GPCRs-expressing cells.

534

### 535 **Two-photon red Ca<sup>2+</sup> imaging in HEK293T cells**

536 HEK293T cells were incubated at 37 °C in 35 mm glass bottom dishes. 0.8 µg DNA

537 encoding the red Ca<sup>2+</sup> sensors and pCMV-mCerulean was transfected as described above. One day

538 after the transfection, the culture medium was replaced with Tyrode solution described above. Thirty

539 seconds after bath application of ionomycin to a final concentration of 5 µM, two-photon imaging was

540 performed with FVMPE-RS (Olympus) equipped with a water-immersion 25x objective (N.A.: 1.05,

541 Olympus), a femtosecond laser (Insight DS+, Spectra-Physics), and two GaAsP detectors (Hamamatsu

542 Photonics) with 495-540 nm and 575-645 nm emission filters (Olympus). Images (339 × 339 µm<sup>2</sup>,

543 1,024 × 1,024 pixels, single optical section) were collected. The laser was tuned to 880 nm for

544 mCerulean and 1,040 nm at the front aperture of the objective) for the red Ca<sup>2+</sup> sensors.

545

### 546 **Stable cell lines generation**

547 Stable cell lines were generated using lentiviral vectors. Lentiviral particles were produced

548 by transfection of the packaging plasmids with polyethylenimine (PEI) into HEK293T cells using the

549 same procedure as previously described (Imayoshi et al., 2013). Lentivirus-infected HEK293T cells

550 were dissociated and isolated into multi-well plates. Single clones with bright fluorescence were

551 picked, grown, and stored at -80 °C. To establish a triple stable cell line (**Figure 2**), cAMPinG1 single  
552 stable cell line was infected with lentivirus encoding TRE3G-DRD1- EF1a-TetOn3G-P2A-mCherry-  
553 NLSx3 and TRE3G-MC3R-EF1a-TetOn3G-P2A-iRFP670. (Shcherbakova et al., 2013)

554

#### 555 **Cell proliferation assay**

556 The proliferation rate of the cAMPinG1 stable cell line was comparable with the original  
557 HEK293T cell line. The HEK293T cells were seeded on 6-well plates with 2 ml DMEM and 10% FBS  
558 or 1.5% FBS and incubated at 37 °C. The 1.5% FBS group was a positive control of slow cell  
559 proliferation. Twenty hours after the beginning of the culture, half of the wells were harvested, and the  
560 number of cells was counted using a counting chamber as a zero-time point. Sixty hours after the  
561 beginning of the culture, the other half of the wells were harvested and counted as a time point of 48  
562 hours.

563

#### 564 ***In utero* electroporation**

565 *In utero* electroporation (IUE) was performed as described previously with minor  
566 modifications (Sakamoto et al., 2022b). Briefly, ICR pregnant mice (Japan SLC) were anesthetized  
567 with an anesthetic mixture (0.075 mg/ml Medetomidine Hydrochloride, 0.40 mg/ml Midazolam, 0.50  
568 mg/ml Butorphanol tartrate) and administered at 100 µl per 10 g of body weight (BW) intraperitoneally.

569 Uterine horns were exposed. 2.0  $\mu$ l of purified plasmid (1.0  $\mu$ g/ $\mu$ l final concentration) was injected  
570 into the right lateral ventricle of embryos at embryonic day (E) 15. pCAG-cAMPinG1-NE and pCAG-  
571 RCaMP3-WPRE were delivered to induce the expression of cAMP and Ca<sup>2+</sup> indicators in L2/3  
572 pyramidal neurons in the V1. After soaking the uterine horn with warm saline (37 °C), each embryo's  
573 head was carefully held between tweezers with platinum 5 mm disk electrodes (CUY650P5,  
574 Nepagene). Subsequently, five electrical pulses (45 V, 50 ms duration at 1 Hz) were delivered by an  
575 electroporator (NEPA21, Nepagene). After the electroporation, the uterine horns were returned into  
576 the abdominal cavity, and the skin was closed with sutures. Electroporated mice were used for cAMP  
577 and calcium imaging 4-10 weeks after birth and *in vivo* two-photon imaging.

578

### 579 **AAV production and injection**

580 Recombinant AAVs were produced using HEK293T cells as previously described with some  
581 modifications (Kawashima et al., 2013). The final titers were the followings: AAV2/1-CAG-DIO-  
582 cAMPinG1-NE ( $5.0 \times 10^{13}$  GC/ml), AAV2/1-CAG-DIO-cAMPinG1mut-NE ( $2.0 \times 10^{13}$  GC/ml),  
583 AAVPHP.eB-CaMKII-Cre ( $1.0 \times 10^{12}$  GC/ml) for cAMP imaging in acute brain slice (**Figure S3**).  
584 AAV2/1-eSyn-jRGECO1a ( $3.0 \times 10^{13}$  GC/ml), AAV2/1-eSyn-RCaMP3 ( $2.0 \times 10^{13}$  GC/ml) for one-  
585 photon and two-photon calcium imaging in the barrel cortex (**Figures 3D-3J**). AAV2/1-eSyn-  
586 jRGECO1a ( $1.0 \times 10^{13}$  GC/ml), AAV2/1-eSyn-RCaMP3 ( $1.0 \times 10^{13}$  GC/ml) for two-photon mesoscale



587 calcium imaging (**Figures 3K-3L**). AAV2/1-eSyn-cAMPinG1-ST ( $1.0 \times 10^{13}$  GC/ml), AAV2/1-eSyn-  
588 RCaMP3 ( $1.0 \times 10^{13}$  GC/ml) for two-photon imaging in the primary visual cortex (**Figures 4 and 5A-**  
589 **5G**). AAV2/1-hSyn-iCre ( $2.0 \times 10^{10}$  GC/ml), AAV2/1-CAG-DIO-cAMPinG1-NE ( $3.0 \times 10^{13}$  GC/ml),  
590 AAV2/1-CAG-DIO-RCaMP3 ( $1.0 \times 10^{13}$  GC/ml, for infection marker), AAV2/1-CAG-DIO-  
591 ChRmine-mScarlet-Kv2.1 ( $1.0 \times 10^{12}$  GC/ml) for cAMP imaging and optogenetic stimulation  
592 (**Figures 5H-5K**). AAV2/1-gfaABC1D-cAMPinG1-NE ( $1.0 \times 10^{13}$  GC/ml), AAV2/1-gfaABC1D-  
593 RCaMP3 ( $1.0 \times 10^{13}$  GC/ml) for astrocyte imaging (**Figure S6**). AAV2/1-eSyn-cAMPinG1-NE ( $7.0 \times$   
594  $10^{12}$  genome copies (GC)/ ml), AAV2/1-eSyn-RCaMP3 ( $1.0 \times 10^{13}$  GC/ml) for fiber photometry in the  
595 dorsal striatum (**Figure 6**).

596 Stereotaxic virus injection was performed to C57BL/6N male mice aged 4-6 weeks  
597 anesthetized by the anesthetic mixture described above except for two-photon mesoscale imaging. A  
598 micropipette was inserted into the right primary visual cortex (A/P -3.85 mm, M/L +2.7 mm from the  
599 bregma, D/V -0.30 mm from the pial surface) or the barrel cortex (A/P -1.0 mm, M/L -3.0 mm from  
600 the bregma, D/V -0.20 mm from the pial surface). Then the virus solution of 500 - 800 nl was injected.  
601 Carprofen (5 mg/kg-BW; Zoetis) was administered intraperitoneally just after the injection experiment.  
602 Mice were subjected to imaging after 4-12 weeks of the injection.

603

604 **cAMP imaging in acute brain slice**

605 AAV (AAVPHP.eB-pCaMKII-Cre and AAV2/1-CAG-DIO-cAMPinG1, or AAV2/1-CAG-DIO-  
606 cAMPinG1mut) was injected into the primary visual cortex at a total volume of 500 nl (Chan et al.,  
607 2017). After 2 weeks of expression, mice were sacrificed by rapid decapitation after anesthesia with  
608 isoflurane. The brains were immediately extracted and immersed in gassed (95% O<sub>2</sub>/5% CO<sub>2</sub>) and ice-  
609 cold solution containing (in mM); (220 sucrose, 3 KCl, 8 MgCl<sub>2</sub>, 1.25 NaH<sub>2</sub>PO<sub>4</sub>, 26 NaHCO<sub>3</sub>, and 25  
610 glucose). Acute coronal brain slices (280 μm thick) of the visual cortex were cut in gassed, ice-cold  
611 solution with a vibratome (VT1200, Leica, Germany). Brain slices were then transferred to an  
612 incubation chamber containing gassed artificial cerebrospinal fluid (ACSF) containing (in mM); 125  
613 NaCl, 2.5 KCl, 1.25 NaH<sub>2</sub>PO<sub>4</sub>, 26 NaHCO<sub>3</sub>, 1 CaCl<sub>2</sub>, 2 MgCl<sub>2</sub>, 20 glucose at 34 °C for 30 minutes  
614 and subsequently maintained at room temperature before transferring them to the recording chamber  
615 and perfused with the ACSF solution described above, except using 2 mM CaCl<sub>2</sub> and 1 mM MgCl<sub>2</sub> at  
616 30-32 °C. cAMP imaging was performed with an upright microscope (BX61WI, Olympus) equipped  
617 with an FV1000 laser-scanning system (FV1000, Olympus, Japan) and a 60 × objective lens (water-  
618 immersion, numerical aperture of 1.0, Olympus), a femtosecond laser (MaiTai, Spectra-Physics), and  
619 a GaAsP detector (Hamamatsu Photonics) with a 500-550 nm emission filter (Semrock). The laser  
620 wavelength was tuned at 940 nm (2 mW at the front aperture of the objective). Images (105.6 × 105.6  
621 μm<sup>2</sup>, 640 × 640 pixels) were taken every 30 seconds. During the imaging, forskolin (Wako) and IBMX  
622 (Tocris) were added to a final concentration of 25 μM and 50 μM, respectively.

623

624 **Simultaneous Ca<sup>2+</sup> imaging and whole-cell recordings in acute brain slices**

625           AAV (AAV2/1-eSyn-RCaMP3 or AAV2/1- eSyn-jRGECO1a) was injected into the barrel  
626 cortex (A/P -1.0 mm, M/L -3.0 mm from the bregma, D/V -0.2 mm from the pial surface) at 20 nl/min  
627 at a volume of 500 nl. After 4 weeks of expression, mice were sacrificed by rapid decapitation after  
628 anesthesia with pentobarbital (100 mg/kg). The brains were immediately extracted and immersed in  
629 gassed (95% O<sub>2</sub>/5% CO<sub>2</sub>) and ice-cold artificial cerebrospinal fluid (ACSF) containing (in mM); 124  
630 NaCl, 2.5 KCl, 1.25 NaH<sub>2</sub>PO<sub>4</sub>, 26 NaHCO<sub>3</sub>, 2 CaCl<sub>2</sub>, 2 MgCl<sub>2</sub>, 10.1 glucose. Acute coronal brain  
631 slices (300 μm thick) of the barrel cortex were cut in gassed, ice-cold ACSF with a vibratome  
632 (VT1200S, Leica). Brain slices were then transferred to an incubation chamber containing gassed  
633 ACSF at 30°C for 60 minutes and subsequently maintained at room temperature before transferring  
634 them to the recording chamber at 35°C.

635           Whole-cell recordings were performed in the layer 2/3 pyramidal neurons of the barrel  
636 cortex with glass recording electrodes (5-8 MΩ) filled with the intracellular solution containing (in  
637 mM): 130 K-gluconate, 4 NaCl, 10 HEPES, 4 Mg-ATP, 0.3 Na-GTP, 7 dipotassium-phosphocreatine,  
638 pH adjusted to 7.0 with KOH (296 mOsm). Electrophysiological data were acquired using a patch-  
639 clamp amplifier (MultiClamp 700B, Molecular devices) filtered at 10 kHz and sampled at 20 kHz.  
640 Single action potentials were evoked by injecting a series of current pulses (2 ms duration) through

641 the patch pipette. Each trial was repeated, and the mean value was presented.

642 Calcium imaging was performed using an upright microscope (BX51WI, Olympus) with a  
643 water immersion 40× (N.A.: 0.8) objective lens (Olympus). To acquire RCaMP3 and jRGECO1a  
644 images with LED light (MCWHLPI, Thorlabs), a U-MWIG3 fluorescence mirror unit (Olympus) was  
645 used. Fluorescent images were captured by a sCMOS camera (Orca-Flash 4.0 v3, Hamamatsu  
646 Photonics) controlled by HC Image software (Hamamatsu Photonics). Images were acquired at 50 Hz  
647 with  $1 \times 1$  binning.

648

#### 649 **Simultaneous calcium imaging and cell-attached recordings *in vivo***

650 Loose-seal cell-attached recordings *in vivo* were performed as performed previously (Inoue  
651 et al., 2019). AAV (AAV2/1-eSyn-RCaMP3) was injected into the barrel cortex (A/P -1.0 mm, M/L -  
652 3.0 mm from the bregma, D/V -0.2 mm from the pial surface) at 20 nl/min at a volume of 500 nl. After  
653 4 weeks of expression, mice were head-fixed and anesthetized with isoflurane (1.5 ~ 2.0 %) throughout  
654 the experiment, and body temperature was kept at 37°C with a heating pad. A craniotomy was made  
655 in the barrel cortex. The exposed brain was covered with 1.5% agarose in ACSF containing the  
656 following (in mM): 150 NaCl, 2.5 KCl, 10 HEPES, 2 CaCl<sub>2</sub>, 1 MgCl<sub>2</sub>, pH 7.3. A glass coverslip was  
657 then placed over the agarose to suppress the brain motion artifacts. A glass electrode (5-8 MΩ) was  
658 filled with ACSF containing Alexa 488 (200 μM). RCaMP3-expressing neurons were targeted using

659 two-photon microscopy (Movable Objective Microscope, Sutter) with a tunable laser (InSight X3,  
660 Spectra-Physics) and a water-immersion  $16\times$  (N.A.: 0.80) objective (Nikon). Fluorescence signals  
661 were collected using a GaAsP photomultiplier tube (Hamamatsu Photonics) with a 590-660 nm  
662 emission filter. After establishing the cell-attached configuration (20-100 M $\Omega$  seal), simultaneous  
663 spike recording and calcium imaging were performed at the soma (sampling rate = 30 Hz,  $512\times 512$   
664 pixels). Electrophysiological data were acquired using a patch-clamp amplifier (MultiClamp 700B;  
665 Molecular devices) in current-clamp mode, filtered at 10 kHz, and sampled at 20 kHz. The laser was  
666 tuned to 1,040 nm (40 mW at the front aperture of the objective).

667

#### 668 **Fiber photometry**

669 Mice were anesthetized by the anesthetic mixture described above. Then, a 400- $\mu\text{m}$ -  
670 diameter mono fiberoptic cannula (Kyocera) was implanted above the right dorsal striatum. A custom-  
671 made metal headplate was attached to the skull with dental cement. Mice were subjected to imaging  
672 after more than 2 days of the surgery.

673 Dual-color fiber photometry for cAMPinG1 and RCaMP3 was performed using GCaMP &  
674 Red Fluorophore Fiber Photometry System (Doric) with 405 nm, 470 nm, and 560 nm LED and 400-  
675  $\mu\text{m}$ -diameter 0.57-N.A. Mono Fiber-optic Patch Cords (Doric). cAMPinG1 was excited by 405 nm  
676 and 470 nm LED, and its fluorescence was detected with a single photodetector with a 500-540 nm

677 emission filter. The green fluorescence by 470 nm excitation was demodulated from green  
678 fluorescence by 405 nm excitation by lock-in amplifier detection. Simultaneously, RCaMP3 was  
679 excited by 560 nm LED and spectrally distinguished from cAMPinG1 signals by a dichroic mirror,  
680 and its fluorescence was detected with a single photodetector with a 580-680 nm emission filter.  
681 Photometry data was recorded at a sampling rate of 30 Hz. Mice were head-fixed during the recordings.

682

### 683 **Cranial window implantation**

684           Craniotomy was performed as described previously (Sakamoto et al., 2022a). Mice were  
685 anesthetized by the anesthetic mixture described above. Before surgery, dexamethasone sodium  
686 phosphate (2 mg/kg-BW; Wako) and carprofen (5 mg/kg-BW; Zoetis) were administered to prevent  
687 inflammation and pain. During surgery, mice were put on a heating pad, and body temperature was  
688 kept at 37 °C. A custom-made stainless head plate was fixed to the skull using cyanoacrylate adhesive  
689 and dental cement (Sun-medical) above the right visual cortex. A craniotomy was drilled with a 2.5  
690 mm diameter, and the brain was kept moist with saline. A cover glass (3 mm diameter, #0 thickness,  
691 Warner Instruments) was placed over the craniotomy site with surgical adhesive glue (Aron Alpha A,  
692 Sankyo). The mice were subjected to imaging more than 18 h after the surgery.

693

### 694 ***In vivo* two-photon imaging**

695 *In vivo* two-photon imaging was performed with FVMPE-RS (Olympus) equipped with a  
696 water-immersion 25x objective (N.A.: 1.05, Olympus), a femtosecond laser (Insight DS+, Spectra-  
697 Physics), and two GaAsP detectors (Hamamatsu Photonics) with 495-540 nm and 575-645 nm  
698 emission filters (Olympus). For somatic cAMP imaging of cAMPinG1 and cAMPinG1mut expressed  
699 by *in utero* electroporation, images ( $339 \times 339 \mu\text{m}^2$ ,  $512 \times 512$  pixels, single optical section) were  
700 collected at 15 Hz in the awake condition. The laser was tuned to 940 nm (48.6 mW at the front  
701 aperture of the objective). For cAMPinG1-NE spine imaging, images ( $28.8 \times 38.4 \mu\text{m}^2$ ,  $96 \times 128$   
702 pixels, single optical section) were collected at 7.5 Hz in the condition anesthetized lightly by  
703 isoflurane (0.5% v/v). The laser power was 23.5 mW at the front aperture of the objective. For  
704 RCaMP3 and cAMPinG1-ST imaging, sequential excitation at 940 nm and 1,040 nm was used for  
705 dual-color imaging. Images ( $339 \times 339 \mu\text{m}^2$ ,  $512 \times 512$  pixels) with three optical planes with plane  
706 spaced  $30 \mu\text{m}$  apart in depth) were collected at 3.4 Hz per plane using a piezo objective scanner  
707 (Olympus). The laser power for 940 nm excitation was set to 47.6 mW, and for 1,040 nm excitation it  
708 was set to 113.7 mW. The imaging with visual stimuli (**Figures 5A-5G**) were followed by the imaging  
709 during forced running (**Figure 4**) on the same cell population. For cAMP and  $\text{Ca}^{2+}$  imaging in  
710 astrocytes, images ( $288 \times 384 \mu\text{m}^2$ ,  $192 \times 256$  pixels) were collected at 1.6 Hz in the awake condition.  
711 The laser power for 940 nm excitation was set to 26.5 mW, and for 1,040 nm excitation, it was set to  
712 52.2 mW. For single-cell cAMP imaging with optical stimulation using soma-targeted ChRmine,

713 images ( $86.4 \times 115.2 \mu\text{m}^2$ ,  $192 \times 256$  pixels) were collected at 3.2 Hz in the awake condition with 940  
714 nm excitation. 1,040 nm two-photon excitation was employed for 4-second spiral scanning with a  
715 diameter of 11  $\mu\text{m}$ . The imaging with a 940 nm laser was temporally stopped during the optical  
716 excitation. The laser power for 940 nm excitation was set to 4.1 mW, and for 1,040 nm  
717 photostimulation, it was set to 39.8 mW.

718

### 719 **Large field of two-photon mesoscale imaging**

720 AAV (AAV2/1-eSyn-RCaMP3) was injected into the neonatal somatosensory cortex as  
721 previously described (Oomoto et al., 2021). After 8 weeks of AAV injection, a 4.5-mm diameter  
722 craniotomy was performed over an area including the primary somatosensory area of the right  
723 hemisphere. A head plate was also fixed to the skull above the cerebellum.

724 Two-photon imaging was performed with FASHIO-2PM (Ota et al., 2021) equipped with a  
725 femtosecond laser (Chameleon Discovery, Coherent). The laser wavelength was 1,040 nm. The field-  
726 of-view was  $3.0 \times 3.0 \text{ mm}^2$  ( $2,048 \times 2,048$  pixels). The sampling rate was 7.5 Hz. Laser power of 270  
727 and 360 mW at the front of the objective lens was used to observe layer 2/3 and 5 neurons of awake  
728 mice, respectively.

729

### 730 **Physical stimulation**



731           Airpuff stimuli (2Hz, 0.1 s duration, 40 times) were generated using a microinjector (BEX).  
732   For the forced running task, mice were head-fixed, and a custom-made treadmill was turned on during  
733   recordings. Moving grating stimuli were generated using the Psychopy in Python as described  
734   previously with some modifications (Chen et al., 2013). The gratings were presented with an LCD  
735   monitor (19.5 inches, 1,600 × 900 pixels, Dell), placed 25 cm in front of the center of the left eye of  
736   the mouse. Each stimulus trial consisted of a 4-s blank period (uniform grey at mean luminance)  
737   followed by a 4-s drifting sinusoidal grating (0.04 cycles per degree, 2 Hz temporal frequency). Eight  
738   drifting directions (separated by 45°, in order from 0° to 315°) were used. The timing of each moving  
739   grating stimulus and the initiation of imaging were monitored with a data acquisition module (USB-  
740   6343, National Instruments).

741

## 742   **QUANTIFICATION AND STATISTICAL ANALYSIS**

### 743   ***In vitro* fluorometry**

744           *In vitro* fluorometry analysis was performed using Python (<https://www.python.org>) and  
745   Excel (Microsoft). For both Ca<sup>2+</sup> and cAMP sensors, the K<sub>d</sub> value and Hill coefficient were calculated  
746   by fitting according to the Hill equation.

747

### 748   **Image analysis**

749 Image analyses were performed with ImageJ (NIH) and Python. For somatic cAMP imaging  
750 of cAMPinG1 and cAMPinG1mut expressed by *in utero* electroporation (**Figures 2A-2E**) and  
751 simultaneous RCaMP3 and cAMPinG1-ST imaging (**Figures 4 and 5A-5G**), motion correction was  
752 performed with Suite2p toolbox (<https://github.com/MouseLand/suite2p>) (Pachitariu et al., 2016). For  
753 cAMPinG1-NE spine imaging (**Figures 2G-2I**), mesoscale RCaMP3 imaging (**Figures 3K-3L and**  
754 **S5**), Ca<sup>2+</sup> and cAMP imaging in astrocytes (**Figure S6**), and cAMP imaging with optical stimulation  
755 using soma-targeted ChRmine (**Figures 5H-5K**), motion correction was performed with TurboReg  
756 (Thevenaz et al., 1998).

757 Regions of interest (ROI) detection for *in vivo* Ca<sup>2+</sup> imaging was performed with Suite2p.  
758 ROI detection for HEK cell live imaging and *in vivo* cAMP imaging were performed with ImageJ  
759 (NIH) and Cellpose (Stringer et al., 2021). ROIs for cAMPinG1-NE spine imaging (**Figures 2G-2I**),  
760 Ca<sup>2+</sup> and cAMP imaging in astrocytes (**Figure S6**), and cAMPinG1-NE imaging with soma-targeted  
761 ChRmine (**Figures 5H-5K**) were drawn manually. The dynamic range was calculated as  $\Delta F/F = (F -$   
762  $F_0)/F_0$ , where  $F_0$  was the average fluorescence intensity before stimulations after the subtraction of  
763 background fluorescence. No bleaching correction was performed in any analyses except Ca<sup>2+</sup> imaging  
764 in acute brain slices (**Figure 3**). No fluorescence crosstalk correction was performed.

765 For cAMP imaging using acute brain slices (**Figure S3**), background subtraction was  
766 performed before calculating  $\Delta F/F$ . ROIs were manually selected around somata in the time series

767 averaged image.  $\Delta F/F$  was calculated as  $(F-F_0) / F_0$ , where  $F$  is the fluorescence intensity at any time  
768 point and  $F_0$  is the average fluorescence before the drug application. For *in vivo* cAMPinG1-NE spine  
769 imaging (**Figures 2G-2I**), the period after stimulation was defined as a 15 s period starting 10 s after  
770 the end of airpuff stimulation. For two-photon  $Ca^{2+}$  imaging in HEK293T cells (**Figure S4**), ROIs  
771 drawn based on mCerulean images with Cellpose were used for both  $Ca^{2+}$  sensor and mCerulean  
772 images. The red fluorescence intensity was divided by mCerulean fluorescence intensity in each cell  
773 for normalization. For  $Ca^{2+}$  imaging using acute brain slices (**Figures 3D-3H**), background subtraction  
774 and bleach correction were performed before calculating  $\Delta F/F$ . ROIs were manually selected around  
775 somata in the time series averaged image.  $\Delta F/F$  was calculated as  $(F-F_0) / F_0$ , where  $F$  is the  
776 fluorescence intensity at any time point and  $F_0$  is resting baseline fluorescence measured 200 ms before  
777 stimulation. The peak amplitude was defined as the maximum value of  $\Delta F/F$  after the stimuli. The rise  
778 and decay curves were fit to a single exponential. The rise time was defined as the time from the  
779 beginning of the stimulus to the time point of the peak fluorescence amplitude. The half-decay time  
780 was defined as the time from the maximum value of  $\Delta F/F$  to half of that value. For simultaneous  
781 RCaMP3 and cAMPinG1-ST imaging (**Figures 4 and 5A-5G**), ROIs for RCaMP3 and cAMPinG1-  
782 ST were drawn independently using Suite2p and Cellpose, respectively. The cells that had ROIs for  
783 both RCaMP3 and cAMPinG1-ST were selected for further analysis. Because the imaging using visual  
784 stimulus (**Figures 5A-5G**) was followed by the imaging using forced running (**Figure 4**) on the same

785 cell population, the same ROIs were used for both analyses. Motion-related neurons were defined as  
786 neurons that showed  $\text{Ca}^{2+} \Delta\text{F}/\text{F}$  more than 0.3 during the running period (**Figure 4**).  $\text{Ca}^{2+}$  responses to  
787 4 s visual stimulation were defined as averaged  $\Delta\text{F}/\text{F}$  during the 4 s stimulation. cAMP responses to 4  
788 s visual stimulation were defined as averaged  $\Delta\text{F}/\text{F}$  during 2 s periods that started 2 s after the end of  
789 the visual stimulus (**Figures 5A-5D**). Neurons that responded to repetitive 8 s visual stimuli were  
790 defined as neurons that showed  $\text{Ca}^{2+} \Delta\text{F}/\text{F}$  more than 0.3 during the stimulation period (**Figures 5E-**  
791 **5G**). The period after repetitive visual stimuli was defined as a 40 s period starting after the end of the  
792 stimuli. The direction selectivity index (DSI) was calculated for cells showing  $\text{Ca}^{2+}$  responses. The  
793 preferred direction ( $\theta_{\text{pref}}$ ) of each cell was defined as the stimulus that induced the largest  $\text{Ca}^{2+} \Delta\text{F}/\text{F}$ .  
794 The DSI was defined as  $\text{DSI} = (R_{\text{pref}} - R_{\text{pref} + \pi}) / (R_{\text{pref}} + R_{\text{pref} + \pi})$ , where  $R_{\text{pref}}$  and  $R_{\text{pref} + \pi}$  are  $\Delta\text{F}/\text{F}$  at the  
795 preferred ( $\theta_{\text{pref}}$ ) and the opposite direction ( $\theta_{\text{pref} + \pi}$ ) respectively. Imaging frames with significant  
796 motion artifacts are removed and supplied with the preceding frames. For cAMPinG1-NE imaging  
797 with soma-targeted ChRmine (**Figures 5K**), cAMP  $\Delta\text{F}/\text{F}$  was defined as averaged  $\Delta\text{F}/\text{F}$  during a 10 s  
798 period starting 20 s after the end of optical stimulation.

799

## 800 **Fiber photometry**

801 Fiber photometry analysis was performed using Python. The cAMPinG1 signal was  
802 calculated as follows: (470 nm signal) / (405 nm signal). The 560 nm signal was recognized as the

803 RCaMP3 signal. The period during stimulation was defined as a 10 s running period, and the period  
804 after stimulation was defined as 10 s after the end of the running period (**Figure 6D**).

805

## 806 **Statistical analysis**

807 All statistical analyses of the acquired data were performed with Python. For each figure, a  
808 statistical test matching the structure of the experiment and the structure of the data was employed.

809 All tests were two-tailed.  $*p < 0.05$ ;  $**p < 0.01$ ;  $***p < 0.001$ ; NS, not significant ( $p > 0.05$ ) for all  
810 statistical analyses presented in figures. No statistical tests were done to predetermine the sample size.

811 Data acquirement and analysis were not blind. Experimental sample sizes are mentioned in the figure  
812 panel and legends.

813

## 814 **ACKNOWLEDGMENTS**

815 We thank the following researchers for kindly sharing their reagents; Haruhiko Bito (eSyn  
816 promoter, cHS4, XCaMP-R, and pCAG-Flpo plasmids), Naoto Saito (gCarvi plasmid), Tyler Jacks  
817 (Addgene plasmid #12093), Vladislav Verkhusha (Addgene plasmid #45457), Jinhyun Kim (Addgene  
818 plasmid # 51904), Baljit Khakh (Addgene plasmid #52924), Tetsuya Kitaguchi (Addgene plasmid  
819 #73938), Douglas Kim (Addgene plasmid #100854), Viviana Gradinaru (Addgene plasmid #103005),  
820 Robert Campbell (Addgene plasmid #105864), Jennifer Garrison (Addgene plasmid #158777), Bryan

821 Roth (Addgene kit #1000000068). We also thank Yu Kato for his technical assistance and the  
822 Sakamoto and Imayoshi laboratory members for their support and comments.

823 This work was supported in part by grants from Precursory Research for Embryonic Science  
824 and Technology (PRESTO)-JST (JPMJPR1906 to M.S.), ACT-X-JST (JPMJAX211K to T.Y.), Grant-  
825 in-Aid for Brain Mapping by Integrated Neurotechnologies for Disease Studies (Brain/MINDS)  
826 (JP22dm0207090 to I.I., JP19dm0207069 to S.Y., JP21dm0207001 to M.M., JP20dm020706 to M.S.),  
827 Strategic Research Program for Brain Sciences (JP22wm0525018 to S.Y., JP22wm0525004 to M.S.),  
828 Interstellar Initiative Beyond (JP22jm0610068 to M.S.), JSPS KAKENHI (JP21K15207 to T.Y.,  
829 JP20H05775 to M.M., JP21K19429, JP20H04122 to M.S.), RIKEN Special Postdoctoral Researchers  
830 Program (to H.U.), Takeda Science Foundation (to M.S.), Lotte Foundation (to M.S.), The Konica  
831 Minolta Science and Technology Foundation (to M.S.), Tokyo Biochemical Research Foundation (to  
832 M.S.), Brain Science Foundation (to M.S.).

833

#### 834 **AUTHOR CONTRIBUTIONS**

835 T.Y. designed and developed cAMP sensors. T.Y. and M.S. designed and developed the  
836 RCaMP3. T.Y. performed most of the experiments and analyzed data. S.M. and K.K. performed  
837 electrophysiological recordings for RCaMP3 characterization. U.H. and M.M. performed Ca<sup>2+</sup>  
838 imaging with the FASHIO-2PM. M.T. and S.Y. performed pharmacological experiments for  
839 cAMPinG1 in acute brain slices. T.Y. and M.S. wrote the paper with input from all authors. I.I. and

840 M.S. supervised the entire project.

841

## 842 **DECLARATION OF INTERESTS**

843 The cAMPinG1 is described in the pending patent.

844

## 845 **FIGURE LEGENDS**

### 846 **Figure 1. Sensor design and *in vitro* characterization of cAMPinG1**

847 **(A)** Top: Primary structure of cAMPinG1. cpGFP and two flanking linkers are inserted into a loop of

848 PKA-R1 $\alpha$  close to the cAMP-binding site. Bottom: Tertiary structures of cAMP-binding PKA-R1 $\alpha$

849 (gray, PDB: 1RGS, cpGFP insertion site of cAMPinG1 is hidden) with cAMP (orange) and cpGFP

850 (green, PDB: 3WLD, calmodulin, and M13 domains are hidden) are shown. The linkers between the

851 two domains are depicted as purple dotted lines. **(B)** *In vitro* screening results of 251 variants, resulting

852 in the variant named cAMPinG1 (red). **(C)** Excitation and emission spectra of cAMPinG1 in cAMP-

853 free (black) and cAMP-saturated (light green) states. Blue and violet excitation wavelengths used for

854 ratiometric imaging in the later figures are indicated as shaded regions in the later figures. Note that

855 green fluorescence intensity increased upon cAMP binding when excited with blue light (488 nm) but

856 decreased when excited with violet light (405nm). **(D)** Primary structures of cAMPinG1mut (inactive

857 mutant), cAMPinG1-NE (nuclear-excluded), and cAMPinG1-NE (soma-targeted). **(E)** The change in

858 fluorescence intensity ( $\Delta F/F$ ) of green cAMP sensors to cAMP in HEK cell lysate. cAMPinG1 had the

859 largest  $\Delta F/F$  in the side-by-side comparison. n = 4 wells (Flamindo2), n = 4 wells (gCarvi), n = 4 wells  
860 (G-Flamp1), n = 4 wells (cAMPinG1), n = 4 wells (cAMPinG1mut). Tukey's post hoc test following  
861 one-way ANOVA. **(F)** cAMP titration curves of cAMP sensors. Response of Flamindo2 to cAMP is  
862 inversed ( $-\Delta F/F$ ). The x-axis is logarithmic. n = 4 wells (Flamindo2), n = 4 wells (gCarvi), n = 4 wells  
863 (G-Flamp1), n = 4 wells (cAMPinG1). **(G)**  $K_d$  values of cAMP sensors. cAMPinG1 and cAMPinG1-  
864 NE had the highest cAMP affinity among the green cAMP sensors. The y-axis is logarithmic. n = 4  
865 wells (Flamindo2), n = 4 wells (gCarvi), n = 4 wells (G-Flamp1), n = 4 wells (cAMPinG1). Tukey's  
866 post hoc test following one-way ANOVA. **(H)** Hill coefficients of cAMP sensors. n = 4 wells  
867 (Flamindo2), n = 4 wells (gCarvi), n = 4 wells (G-Flamp1), n = 4 wells (cAMPinG1). Tukey's post  
868 hoc test following one-way ANOVA. **(I)** Schematic of the imaging settings. Blue (488 nm) and violet  
869 (405 nm) excitation lights were used in turns for ratiometric imaging in HEK293T cells. **(J)**  
870 Representative images of HEK293T cells expressing cAMPinG1 excited by blue (488 nm, left) and  
871 violet (405 nm, right) lights before (top) and after (bottom) 50  $\mu\text{M}$  forskolin application. Scale bar, 10  
872  $\mu\text{m}$ . **(K)**  $\Delta F/F$  of cAMPinG1 (left) and the inactive mutant cAMPinG1mut (right) in response to 50  
873  $\mu\text{M}$  forskolin application. Blue (blue line) and violet lights (violet line) were used for excitation  
874 sequentially, and the ratio of fluorescence excited with blue and violet lights (488 ex / 405 ex) was  
875 also shown (black line). n = 196 (cAMPinG1), n = 164 (cAMPinG1mut) cells. All shaded areas and  
876 error bars denote the SEM.



877

878 **Figure 2. *In vivo* two-photon cAMPinG1 imaging in somata and dendritic spines**

879 **(A)** Schematic of the experimental procedure of cAMPinG1 somatic imaging. cAMPinG1 or  
880 cAMPinG1mut was delivered to neurons in layer 2/3 (L2/3) of the mouse primary visual cortex (V1)  
881 by *in utero* electroporation. **(B)** A representative *in vivo* two-photon fluorescence image of cAMPinG1.  
882 Scale bar, 50  $\mu\text{m}$ . **(C)** Single-trial cAMP traces of representative 3 cells. The orange box indicates the  
883 timing of the stimulus. **(D)** Averaged traces of somatic signals of cAMPinG1 (left) and cAMPinG1mut  
884 (right) in response to airpuff stimulation. n = 47 neurons in 4 mice (cAMPinG1), n = 39 neurons in 4  
885 mice (cAMPinG1mut). **(E)** Averaged  $\Delta F/F$  of cAMPinG1 and cAMPinG1mut in response to airpuff  
886 stimulation. n = 47 neurons in 4 mice (cAMPinG1), n = 39 neurons in 4 mice (cAMPinG1mut).  
887 Unpaired t-test. **(F)** Half-decay time of somatic cAMP transients in response to airpuff. n = 47 neurons  
888 in 4 mice. **(G)** A representative image of cAMPinG1 imaging in spines and their shaft. cAMPinG1  
889 fluorescence (top),  $\Delta F/F$  before (middle) and after (bottom) airpuff. Scale bar, 5  $\mu\text{m}$ . **(H)**  
890 Representative traces of a dendritic shaft and two spines. The orange square indicates the timing of  
891 the stimulus. **(I)** Averaged  $\Delta F/F$  of cAMPinG1 in dendritic shafts and spines. n = 56 spines, n = 11  
892 shafts in 4 mice. Unpaired t-test. All shaded areas and error bars denote the SEM.

893

894 **Figure 3. Engineering and characterization of RCaMP3**

895 (A) Top: Primary structure of RCaMP3. The location of substitutions relative to R-GECO1 is indicated  
896 in R-GECO1 numbering. Bottom: Tertiary structures of R-GECO1 (PDB: 4I2Y) depicted as ribbon  
897 diagrams. Amino acids mutated in RCaMP3 are indicated in sphere shape. (B)  $\Delta F/F$  of red  $Ca^{2+}$   
898 indicators in HEK cell lysate. RCaMP3 had the largest  $\Delta F/F$ . n = 4 wells (jRGECO1a), n = 4 wells  
899 (XCAMP-R), n = 4 wells (RCaMP3). Tukey's post hoc test following one-way ANOVA. (C) Two-  
900 photon (1,040 nm) fluorescence intensities of red  $Ca^{2+}$  sensors in live HEK cells in the presence of  
901 ionomycin application. n = 360 (jRGECO1a), n = 267 (XCAMP-R), n = 376 (RCaMP3) cells. Tukey's  
902 post hoc test following one-way ANOVA. (D) Schematic of the experimental procedure of  $Ca^{2+}$   
903 imaging under a whole-cell patch-clamp configuration in acute brain slices. (E) Representative  $Ca^{2+}$   
904 traces of jRGECO1a and RCaMP3 in response to a single action potential. Grey lines denote individual  
905 traces (10 trials), and colored thick lines denote average response. The black vertical lines indicate  
906 stimuli. (F-H)  $\Delta F/F$  (F), rise time (G), and half-decay time (H) of jRGECO1a and RCaMP3 in  
907 response to a single action potential. n = 7 neurons (jRGECO1a), n = 6 neurons (RCaMP3). (I)  
908 Schematic of the experimental procedure of  $Ca^{2+}$  imaging under a cell-attached recording *in vivo*. (J)  
909 Representative trace of simultaneous measurement of RCaMP3 fluorescence and action potentials *in*  
910 *vivo*. The number of spikes for each event is indicated below the trace. The image shows a neuron  
911 expressing RCaMP3 (magenta) with the recording pipette (green). Scale bar, 20  $\mu m$ . (K) Schematic  
912 of the experimental procedure of two-photon mesoscale  $Ca^{2+}$  imaging using fast-scanning high optical

913 invariant two-photon microscopy (FASHIO-2PM). Cortical layer 5 (L5) neurons in the field-of-view  
914 (FOV,  $3.0 \times 3.0 \text{ mm}^2$ ) were imaged by 1,040 nm excitation. **(L)** Left: A representative full FOV of  
915 FASHIO-2PM. Scale bar, 500  $\mu\text{m}$ . Right: Magnified images and  $\text{Ca}^{2+}$  traces of representative 12  
916 neurons. Scale bar, 10  $\mu\text{m}$ . All error bars denote the SEM.

917

918 **Figure 4. *In vivo* dual-color imaging for  $\text{Ca}^{2+}$  and cAMP during forced running**

919 **(A)** Schematic of AAVs. AAVs encoding RCaMP3 and cAMPinG1-ST were co-injected into the L2/3  
920 of the V1. **(B)** Schematic of the experimental procedure. Sequential excitation at 940 nm and 1,040  
921 nm was used for dual-color imaging of cAMPinG1-ST and RCaMP3. Three optical planes spaced 30  
922  $\mu\text{m}$  apart were imaged at 3.4 Hz per plane using a piezo objective scanner. **(C)** Representative images  
923 of RCaMP3 and cAMPinG1-ST. Scale bar, 50  $\mu\text{m}$ . **(D)** Single-trial traces of RCaMP3 and cAMPinG1-  
924 ST. Cells are sorted according to  $\Delta F/F$  of RCaMP3 during running.  $n = 461$  cells in 1 mouse. **(E)**  
925 Single-trial traces of RCaMP3 (magenta) and cAMPinG1-ST (green) of two representative cells. The  
926 orange box indicates the period of forced running. The cell number on the top corresponds to the  
927 number in (D). **(F)** Averaged fluorescence transients of RCaMP3 (magenta) and cAMPinG1-ST  
928 (green).  $n = 137$  cells in 1 mouse (left),  $n = 324$  cells in 1 mouse (right). **(G)** Cumulative plot of mean  
929 cAMP  $\Delta F/F$  of motion-related (green) and non-related (black) cells during forced running.  $n = 137$   
930 cells in 1 mouse (green),  $n = 324$  cells in 1 mouse (black). Kolmogorov–Smirnov test. **(H)** Averaged

931  $\Delta F/F$  of RCaMP3 (magenta) and cAMPinG1-ST (green) during forced running.  $n = 3$  mice. Paired t-  
932 test. All shaded areas and error bars denote the SEM.

933

934 **Figure 5. *In vivo* dual-color imaging for  $Ca^{2+}$  and cAMP during visual stimulation**

935 **(A)** Schematic of the experimental procedure. Moving gratings of 8 directions were used to induce

936 cell-specific  $Ca^{2+}$  transients in L2/3 neurons of the V1. **(B)** Averaged fluorescence transients of

937 RCaMP3 (magenta) and cAMPinG1-ST (green) of 3 representative cells. **(C)** Direction-selective

938 visual responses of RCaMP3 (magenta) and cAMPinG1-ST (green) of the 3 representative cells in (B).

939 **(D)** Averaged direction-selective visual responses of RCaMP3 (magenta) and cAMPinG1-ST (green).

940 Top: neurons showing a direction selectivity index (DSI)  $< 0.4$  in  $Ca^{2+}$  response.  $n = 94$  cells in 3 mice.

941 Bottom: neurons showing a direction selectivity index (DSI)  $\geq 0.4$  in  $Ca^{2+}$  response.  $n = 101$  cells in

942 3 mice. **(E)** Single-trial traces of RCaMP3 (magenta) and cAMPinG1-ST (green) of 2 representative

943 cells. The orange box indicates the period of visual stimuli. **(F)** Averaged fluorescence transients of

944 RCaMP3 (magenta) and cAMPinG1-ST (green).  $n = 53$  cells in 1 mouse (left),  $n = 408$  cells in 1

945 mouse (right). **(G)** Averaged  $\Delta F/F$  of RCaMP3 (magenta) and cAMPinG1-ST (green) during and after

946 the visual stimuli.  $n = 3$  mice. Paired t-test. **(H)** Schematic of AAVs for sparse expression of

947 cAMPinG1-NE and soma-targeted ChRmine. **(I)** Representative fluorescence images of cAMPinG1-

948 NE and ChRmine-mScarlet-Kv2.1. Scale bar, 10  $\mu m$ . **(J)** Averaged fluorescence transients of

949 cAMPinG1-NE in response to 1,040 nm photostimulation. n = 11 neurons in 3 mice (ChRmine (+),  
950 green), n = 11 neurons in 3 mice (ChRmine (-), black). **(K)** Averaged  $\Delta F/F$  of cAMPinG1-NE in  
951 response to 1,040 nm photostimulation. n = 11 neurons in 3 mice (ChRmine (+), photostim (+)), n =  
952 11 neurons in 3 mice (ChRmine (-), photostim (+)), n = 9 neurons in 3 mice (ChRmine (+), photostim  
953 (-)). Tukey's post hoc test following one-way ANOVA. All shaded areas and error bars denote the  
954 SEM.

955

#### 956 **Figure 6. Dual-color fiber photometry for Ca<sup>2+</sup> and cAMP**

957 **(A)** Schematic of the experimental procedure. Dual-color fiber photometry was performed in the  
958 dorsal striatum (dStr) during a forced running task. **(B)** Representative single-trial traces of  
959 cAMPinG1-NE (green, left), cAMPinG1mut-NE (green, right), and RCaMP3 (magenta) signals. The  
960 orange box indicates the period of forced running. **(C)** Averaged fluorescence traces of cAMPinG1-  
961 NE (green, left), cAMPinG1mut-NE (green, right), and RCaMP3 (magenta) signals. n = 27 trials in 3  
962 mice (left), n = 27 trials in 3 mice (right). **(D)** Averaged  $\Delta F/F$  of cAMPinG1-NE and cAMPinG1mut-  
963 NE during and after the stimulation. n = 27 trials in 3 mice (cAMPinG1-NE), n = 27 trials in 3 mice  
964 (cAMPinG1mut-NE). Unpaired t-test. All shaded areas and error bars denote the SEM.

965

#### 966 **Figure 7. Single-cell, single-timepoint cAMPinG1 imaging for GPCR biology and drug screening**

967 **(A)** Schematic of the expression system (top). The plasmid encoding pTRE-DRD1-P2A-mCherry-  
968 reverse-PGK-TetOn was transfected into a cAMPinG1 stable cell line. Doxycycline was added 3 hours  
969 before the imaging to induce expression of DRD1-P2A-mCherry. Representative images of  
970 cAMPinG1 stable cell line expressing DRD1-P2A-RFP in the absence (middle) or presence (bottom)  
971 of 1,000 nM dopamine were taken by alternating 405/488/561 nm lasers excitation. Scale bar, 20  $\mu$ m.  
972 **(B)** Correlation between blue ex/violet ex ratio of cAMPinG1 and DRD1-P2A-RFP expression level.  
973 Individual dots indicate single cells. n = 141 (dopamine (-), top) and 190 (dopamine (+), bottom) cells.  
974 Pearson correlation coefficient in linear regression,  $r = 0.66$ ;  $p < 0.001$  (top) and  $r = -0.03$ ;  $p = 0.64$   
975 (bottom). **(C)** Schematic of the expression system (top). Representative images of a cAMPinG1 cell  
976 line expressing DRD2-P2A-RFP in the absence (middle) or presence (bottom) of 1,000 nM dopamine  
977 were taken by alternating 405/488/561 nm lasers excitation. 0.5  $\mu$ M forskolin was applied in both  
978 conditions. Scale bar, 20  $\mu$ m. **(D)** Correlation between blue ex/violet ex ratio of cAMPinG1 and  
979 DRD2-P2A-RFP expression level. Individual dots indicate single cells. n = 180 (dopamine (-), top)  
980 and 154 (dopamine (+), bottom) HEK293T cells. Pearson correlation coefficient in linear regression,  
981  $r = 0.07$ ;  $p = 0.35$  (top) and  $r = -0.59$ ;  $p < 0.001$  (bottom). **(E)** The blue ex/violet ex ratio of cAMPinG1  
982 cells transiently expressing GPCRs-P2A-RFP in the absence of ligands, indicating the constitutive  
983 activity of each GPCR. n = 158 (ARDB2), 141 (DRD1), 151 (DRD2), 178 (GPR52), 126 (no TFX)  
984 cells. Tukey's post hoc test following one-way ANOVA. **(F)** Blue ex/violet ex ratio of cAMPinG1 cell

985 line expressing GPCRs-P2A-RFP with or without agonists. Note that clozapine is known to act as an  
986 inverse agonist against HTR6. n = 141 (DRD1), 190 (Dopamine + DRD1), 180 (FSK + DRD2), 154  
987 (Dopamine + FSK + DRD2) cells (left). n = 159 (HTR6), 151 (5HT + HTR6), 135 (Clozapine + HTR6),  
988 204 (5HT + no TFX) cells (right). Tukey's post hoc test following one-way ANOVA. **(G)** Schematic  
989 of the expression system (top). Representative images of a mixture of cell lines stably expressing  
990 cAMPinG1, DRD1 and RFP, and cell lines stably expressing cAMPinG1, MC3R and iRFP in the  
991 presence of 100 nM dopamine (middle) or 1,000nM ACTH (bottom). Representative cells expressing  
992 DRD1/RFP or MC3R/iRFP were indicated by arrows or arrowheads, respectively. Scale bar, 20  $\mu$ m.  
993 **(H)** The blue ex/violet ex ratio of each cell line in the presence of dopamine or ACTH. Both cell line  
994 showed ligand-specific cAMP elevation. n = 95 (ACTH + DRD1), 87 (ACTH + MC3R), 72 (dopamine  
995 + DRD1), 161 (dopamine + MC3R) cells. Tukey's post hoc test following one-way ANOVA. All error  
996 bars denote the SEM.

997     **REFERENCES**

- 998     Adams, S.R., Harootunian, A.T., Buechler, Y.J., Taylor, S.S., and Tsien, R.Y. (1991). Fluorescence ratio  
999     imaging of cyclic AMP in single cells. *Nature* 349, 694-697. 10.1038/349694a0.
- 1000     Canaves, J.M., and Taylor, S.S. (2002). Classification and phylogenetic analysis of the cAMP-dependent  
1001     protein kinase regulatory subunit family. *J Mol Evol* 54, 17-29. 10.1007/s00239-001-0013-1.
- 1002     Chen, T.W., Wardill, T.J., Sun, Y., Pulver, S.R., Renninger, S.L., Baohan, A., Schreiter, E.R., Kerr, R.A.,  
1003     Orger, M.B., Jayaraman, V., et al. (2013). Ultrasensitive fluorescent proteins for imaging neuronal activity.  
1004     *Nature* 499, 295-300. 10.1038/nature12354.
- 1005     Chan, K.Y., Jang, M.J., Yoo, B.B., Greenbaum, A., Ravi, N., Wu, W.L., Sanchez-Guardado, L., Lois, C.,  
1006     Mazmanian, S.K., Deverman, B.E., and Gradinaru, V. (2017). Engineered AAVs for efficient noninvasive  
1007     gene delivery to the central and peripheral nervous systems. *Nat Neurosci* 20, 1172-1179. 10.1038/nn.4593.
- 1008     Chen, Y., Jang, H., Spratt, P.W.E., Kosar, S., Taylor, D.E., Essner, R.A., Bai, L., Leib, D.E., Kuo, T.W., Lin,  
1009     Y.C., et al. (2020). Soma-Targeted Imaging of Neural Circuits by Ribosome Tethering. *Neuron* 107, 454-  
1010     469 e456. 10.1016/j.neuron.2020.05.005.
- 1011     Dagliyan, O., Tarnawski, M., Chu, P.H., Shirvanyants, D., Schlichting, I., Dokholyan, N.V., and Hahn, K.M.  
1012     (2016). Engineering extrinsic disorder to control protein activity in living cells. *Science* 354, 1441-1444.  
1013     10.1126/science.aah3404.
- 1014     Dana, H., Mohar, B., Sun, Y., Narayan, S., Gordus, A., Hasseman, J.P., Tsegaye, G., Holt, G.T., Hu, A.,



- 1015 Walpita, D., et al. (2016). Sensitive red protein calcium indicators for imaging neural activity. *Elife* 5.  
1016 10.7554/eLife.12727.
- 1017 Duffet, L., Kosar, S., Panniello, M., Viberti, B., Bracey, E., Zych, A.D., Radoux-Mergault, A., Zhou, X.,  
1018 Dernic, J., Ravotto, L., et al. (2022). A genetically encoded sensor for in vivo imaging of orexin  
1019 neuropeptides. *Nat Methods* 19, 231-241. 10.1038/s41592-021-01390-2.
- 1020 Fenno, L.E., Ramakrishnan, C., Kim, Y.S., Evans, K.E., Lo, M., Vesuna, S., Inoue, M., Cheung, K.Y.M.,  
1021 Yuen, E., Pichamoorthy, N., et al. (2020). Comprehensive Dual- and Triple-Feature Intersectional Single-  
1022 Vector Delivery of Diverse Functional Payloads to Cells of Behaving Mammals. *Neuron* 107, 836-853 e811.  
1023 10.1016/j.neuron.2020.06.003.
- 1024 Hackley, C.R., Mazzoni, E.O., and Blau, J. (2018). cAMPr: A single-wavelength fluorescent sensor for  
1025 cyclic AMP. *Sci Signal* 11. 10.1126/scisignal.aah3738.
- 1026 Hauser, A.S., Avet, C., Normand, C., Mancini, A., Inoue, A., Bouvier, M., and Gloriam, D.E. (2022).  
1027 Common coupling map advances GPCR-G protein selectivity. *Elife* 11. 10.7554/eLife.74107.
- 1028 Iino, Y., Sawada, T., Yamaguchi, K., Tajiri, M., Ishii, S., Kasai, H., and Yagishita, S. (2020). Dopamine D2  
1029 receptors in discrimination learning and spine enlargement. *Nature* 579, 555-560. 10.1038/s41586-020-  
1030 2115-1.
- 1031 Imayoshi, I., Isomura, A., Harima, Y., Kawaguchi, K., Kori, H., Miyachi, H., Fujiwara, T., Ishidate, F., and  
1032 Kageyama, R. (2013). Oscillatory control of factors determining multipotency and fate in mouse neural

- 1033 progenitors. *Science* *342*, 1203-1208. 10.1126/science.1242366.
- 1034 Ino, D., Tanaka, Y., Hibino, H., and Nishiyama, M. (2022). A fluorescent sensor for real-time measurement  
1035 of extracellular oxytocin dynamics in the brain. *Nat Methods* *19*, 1286-1294. 10.1038/s41592-022-01597-  
1036 x.
- 1037 Inoue, M., Takeuchi, A., Horigane, S., Ohkura, M., Gengyo-Ando, K., Fujii, H., Kamijo, S., Takemoto-  
1038 Kimura, S., Kano, M., Nakai, J., et al. (2015). Rational design of a high-affinity, fast, red calcium indicator  
1039 R-CaMP2. *Nat Methods* *12*, 64-70. 10.1038/nmeth.3185.
- 1040 Inoue, M., Takeuchi, A., Manita, S., Horigane, S.I., Sakamoto, M., Kawakami, R., Yamaguchi, K., Otomo,  
1041 K., Yokoyama, H., Kim, R., et al. (2019). Rational Engineering of XCaMPs, a Multicolor GECI Suite for  
1042 In Vivo Imaging of Complex Brain Circuit Dynamics. *Cell* *177*, 1346-1360 e1324.  
1043 10.1016/j.cell.2019.04.007.
- 1044 Kandel, E.R., Dudai, Y., and Mayford, M.R. (2014). The molecular and systems biology of memory. *Cell*  
1045 *157*, 163-186. 10.1016/j.cell.2014.03.001.
- 1046 Kawashima, T., Kitamura, K., Suzuki, K., Nonaka, M., Kamijo, S., Takemoto-Kimura, S., Kano, M., Okuno,  
1047 H., Ohki, K., and Bito, H. (2013). Functional labeling of neurons and their projections using the synthetic  
1048 activity-dependent promoter E-SARE. *Nat Methods* *10*, 889-895. 10.1038/nmeth.2559.
- 1049 Kawata, S., Mukai, Y., Nishimura, Y., Takahashi, T., and Saitoh, N. (2022). Green fluorescent cAMP  
1050 indicator of high speed and specificity suitable for neuronal live-cell imaging. *Proc Natl Acad Sci U S A*

- 1051 *119*, e2122618119. 10.1073/pnas.2122618119.
- 1052 Kim, C., Cheng, C.Y., Saldanha, S.A., and Taylor, S.S. (2007). PKA-I holoenzyme structure reveals a  
1053 mechanism for cAMP-dependent activation. *Cell 130*, 1032-1043. 10.1016/j.cell.2007.07.018.
- 1054 Kishi, K.E., Kim, Y.S., Fukuda, M., Inoue, M., Kusakizako, T., Wang, P.Y., Ramakrishnan, C., Byrne,  
1055 E.F.X., Thadhani, E., Paggi, J.M., et al. (2022). Structural basis for channel conduction in the pump-like  
1056 channelrhodopsin ChRmine. *Cell 185*, 672-689 e623. 10.1016/j.cell.2022.01.007.
- 1057 Kroeze, W.K., Sassano, M.F., Huang, X.P., Lansu, K., McCorvy, J.D., Giguere, P.M., Sciaky, N., and Roth,  
1058 B.L. (2015). PRESTO-Tango as an open-source resource for interrogation of the druggable human  
1059 GPCRome. *Nat Struct Mol Biol 22*, 362-369. 10.1038/nsmb.3014.
- 1060 Lin, X., Li, M., Wang, N., Wu, Y., Luo, Z., Guo, S., Han, G.W., Li, S., Yue, Y., Wei, X., et al. (2020).  
1061 Structural basis of ligand recognition and self-activation of orphan GPR52. *Nature 579*, 152-157.  
1062 10.1038/s41586-020-2019-0.
- 1063 Liu, W., Liu, C., Ren, P.G., Chu, J., and Wang, L. (2022). An Improved Genetically Encoded Fluorescent  
1064 cAMP Indicator for Sensitive cAMP Imaging and Fast Drug Screening. *Front Pharmacol 13*, 902290.  
1065 10.3389/fphar.2022.902290.
- 1066 Lee, Y., Su, M., Messing, A., and Brenner, M. (2006). Astrocyte heterogeneity revealed by expression of a  
1067 GFAP-LacZ transgene. *Glia 53*, 677-687. 10.1002/glia.20320.
- 1068 Lorenz, R., Moon, E.W., Kim, J.J., Schmidt, S.H., Sankaran, B., Pavlidis, I.V., Kim, C., and Herberg, F.W.

- 1069 (2017). Mutations of PKA cyclic nucleotide-binding domains reveal novel aspects of cyclic nucleotide  
1070 selectivity. *Biochem J* 474, 2389-2403. 10.1042/BCJ20160969.
- 1071 Ludwig, A., Zong, X., Jeglitsch, M., Hofmann, F., and Biel, M. (1998). A family of hyperpolarization-  
1072 activated mammalian cation channels. *Nature* 393, 587-591. 10.1038/31255.
- 1073 Ma, L., Day-Cooney, J., Benavides, O.J., Muniak, M.A., Qin, M., Ding, J.B., Mao, T., and Zhong, H. (2022).  
1074 Locomotion activates PKA through dopamine and adenosine in striatal neurons. *Nature* 611, 762-768.  
1075 10.1038/s41586-022-05407-4.
- 1076 Ma, L., Jongbloets, B.C., Xiong, W.H., Melander, J.B., Qin, M., Lameyer, T.J., Harrison, M.F., Zemelman,  
1077 B.V., Mao, T., and Zhong, H. (2018). A Highly Sensitive A-Kinase Activity Reporter for Imaging  
1078 Neuromodulatory Events in Awake Mice. *Neuron* 99, 665-679 e665. 10.1016/j.neuron.2018.07.020.
- 1079 Marshel, J.H., Kim, Y.S., Machado, T.A., Quirin, S., Benson, B., Kadmon, J., Raja, C., Chibukhchyan, A.,  
1080 Ramakrishnan, C., Inoue, M., et al. (2019). Cortical layer-specific critical dynamics triggering perception.  
1081 *Science* 365. 10.1126/science.aaw5202.
- 1082 Massengill, C.I., Bayless-Edwards, L., Ceballos, C.C., Cebul, E.R., Cahill, J., Bharadwaj, A., Wilson, E.,  
1083 Qin, M., Whorton, M.R., Bacongus, I., et al. (2022). Sensitive genetically encoded sensors for population  
1084 and subcellular imaging of cAMP in vivo. *Nat Methods* 19, 1461-1471. 10.1038/s41592-022-01646-5.
- 1085 Massengill, C.I., Day-Cooney, J., Mao, T., and Zhong, H. (2021). Genetically encoded sensors towards  
1086 imaging cAMP and PKA activity in vivo. *J Neurosci Methods* 362, 109298.

- 1087 10.1016/j.jneumeth.2021.109298.
- 1088 Odaka, H., Arai, S., Inoue, T., and Kitaguchi, T. (2014). Genetically-encoded yellow fluorescent cAMP  
1089 indicator with an expanded dynamic range for dual-color imaging. *PLoS One* 9, e100252.  
1090 10.1371/journal.pone.0100252.
- 1091 Oe, Y., Wang, X., Patriarchi, T., Konno, A., Ozawa, K., Yahagi, K., Hirai, H., Tsuboi, T., Kitaguchi, T., Tian,  
1092 L., et al. (2020). Distinct temporal integration of noradrenaline signaling by astrocytic second messengers  
1093 during vigilance. *Nat Commun* 11, 471. 10.1038/s41467-020-14378-x.
- 1094 Ohkura, M., Sasaki, T., Kobayashi, C., Ikegaya, Y., and Nakai, J. (2012). An improved genetically encoded  
1095 red fluorescent Ca<sup>2+</sup> indicator for detecting optically evoked action potentials. *PLoS One* 7, e39933.  
1096 10.1371/journal.pone.0039933.
- 1097 Omori, K., and Kotera, J. (2007). Overview of PDEs and their regulation. *Circ Res* 100, 309-327.  
1098 10.1161/01.RES.0000256354.95791.f1.
- 1099 Oomoto, I., Uwamori, H., Matsubara, C., Odagawa, M., Kobayashi, M., Kobayashi, K., Ota, K., and  
1100 Murayama, M. (2021). Protocol for cortical-wide field-of-view two-photon imaging with quick neonatal  
1101 adeno-associated virus injection. *STAR Protoc* 2, 101007. 10.1016/j.xpro.2021.101007.
- 1102 Ota, K., Oisi, Y., Suzuki, T., Ikeda, M., Ito, Y., Ito, T., Uwamori, H., Kobayashi, K., Kobayashi, M.,  
1103 Odagawa, M., et al. (2021). Fast, cell-resolution, contiguous-wide two-photon imaging to reveal functional  
1104 network architectures across multi-modal cortical areas. *Neuron* 109, 1810-1824 e1819.

- 1105 10.1016/j.neuron.2021.03.032.
- 1106 Pachitariu, M., Stringer, C., Dipoppa, M., Schröder, S., Rossi, L.F., Dalgleish, H., Carandini, M., and Harris,  
1107 K.D. (2016). Suite2p: beyond 10,000 neurons with standard two-photon microscopy. bioRxiv, 1-30.  
1108 10.1101/061507.
- 1109 Parker, J.G., Marshall, J.D., Ahanonu, B., Wu, Y.W., Kim, T.H., Grewe, B.F., Zhang, Y., Li, J.Z., Ding, J.B.,  
1110 Ehlers, M.D., and Schnitzer, M.J. (2018). Diametric neural ensemble dynamics in parkinsonian and  
1111 dyskinetic states. *Nature* 557, 177-182. 10.1038/s41586-018-0090-6.
- 1112 Reimer, J., McGinley, M.J., Liu, Y., Rodenkirch, C., Wang, Q., McCormick, D.A., and Tolias, A.S. (2016).  
1113 Pupil fluctuations track rapid changes in adrenergic and cholinergic activity in cortex. *Nat Commun* 7,  
1114 13289. 10.1038/ncomms13289.
- 1115 Sakamoto, M., Inoue, M., Takeuchi, A., Kobari, S., Yokoyama, T., Horigane, S.I., Takemoto-Kimura, S.,  
1116 Abe, M., Sakimura, K., Kano, M., et al. (2022a). A Flp-dependent G-CaMP9a transgenic mouse for  
1117 neuronal imaging in vivo. *Cell Rep Methods* 2, 100168. 10.1016/j.crmeth.2022.100168.
- 1118 Sakamoto, M., Ota, K., Kondo, Y., Okamura, M., Fujii, H., and Bitto, H. (2022b). In utero electroporation  
1119 and cranial window implantation for in vivo wide-field two-photon calcium imaging using G-CaMP9a  
1120 transgenic mice. *STAR Protoc* 3, 101421. 10.1016/j.xpro.2022.101421.
- 1121 Schihada, H., Shekhani, R., and Schulte, G. (2021). Quantitative assessment of constitutive G protein-  
1122 coupled receptor activity with BRET-based G protein biosensors. *Sci Signal* 14, eabf1653.

- 1123 10.1126/scisignal.abf1653.
- 1124 Shcherbakova, D.M., and Verkhusha, V.V. (2013). Near-infrared fluorescent proteins for multicolor in vivo  
1125 imaging. *Nat Methods* 10, 751-754. 10.1038/nmeth.2521.
- 1126 Shen, Y., Dana, H., Abdelfattah, A.S., Patel, R., Shea, J., Molina, R.S., Rawal, B., Rancic, V., Chang, Y.F.,  
1127 Wu, L., et al. (2018). A genetically encoded Ca(2+) indicator based on circularly permuted sea anemone  
1128 red fluorescent protein eqFP578. *BMC Biol* 16, 9. 10.1186/s12915-018-0480-0.
- 1129 Stringer, C., Pachitariu, M., Steinmetz, N., Reddy, C.B., Carandini, M., and Harris, K.D. (2019).  
1130 Spontaneous behaviors drive multidimensional, brainwide activity. *Science* 364, 255.  
1131 10.1126/science.aav7893.
- 1132 Stringer, C., Wang, T., Michaelos, M., and Pachitariu, M. (2021). Cellpose: a generalist algorithm for  
1133 cellular segmentation. *Nat Methods* 18, 100-106. 10.1038/s41592-020-01018-x.
- 1134 Su, Y., Dostmann, W.R., Herberg, F.W., Durick, K., Xuong, N.H., Ten Eyck, L., Taylor, S.S., and Varughese,  
1135 K.I. (1995). Regulatory subunit of protein kinase A: structure of deletion mutant with cAMP binding  
1136 domains. *Science* 269, 807-813. 10.1126/science.7638597.
- 1137 Tang, S., and Yasuda, R. (2017). Imaging ERK and PKA Activation in Single Dendritic Spines during  
1138 Structural Plasticity. *Neuron* 93, 1315-1324 e1313. 10.1016/j.neuron.2017.02.032.
- 1139 Thevenaz, P., Ruttimann, U.E., and Unser, M. (1998). A pyramid approach to subpixel registration based  
1140 on intensity. *IEEE Trans Image Process* 7, 27-41. 10.1109/83.650848.

- 1141 Unger, E.K., Keller, J.P., Altermatt, M., Liang, R., Matsui, A., Dong, C., Hon, O.J., Yao, Z., Sun, J., Banala,  
1142 S., et al. (2020). Directed Evolution of a Selective and Sensitive Serotonin Sensor via Machine Learning.  
1143 *Cell* 183, 1986-2002 e1926. 10.1016/j.cell.2020.11.040.
- 1144 Wang, L., Wu, C., Peng, W., Zhou, Z., Zeng, J., Li, X., Yang, Y., Yu, S., Zou, Y., Huang, M., et al. (2022).  
1145 A high-performance genetically encoded fluorescent indicator for in vivo cAMP imaging. *Nat Commun* 13,  
1146 5363. 10.1038/s41467-022-32994-7.
- 1147 Wang, Q., Dong, X., Lu, J., Hu, T., and Pei, G. (2020). Constitutive activity of a G protein-coupled receptor,  
1148 DRD1, contributes to human cerebral organoid formation. *Stem Cells* 38, 653-665. 10.1002/stem.3156.
- 1149 Wu, J., Brown, S., Xuong, N.H., and Taylor, S.S. (2004). R1alpha subunit of PKA: a cAMP-free structure  
1150 reveals a hydrophobic capping mechanism for docking cAMP into site B. *Structure* 12, 1057-1065.  
1151 10.1016/j.str.2004.03.022.
- 1152 Wu, J., Liu, L., Matsuda, T., Zhao, Y., Rebane, A., Drobizhev, M., Chang, Y.F., Araki, S., Arai, Y., March,  
1153 K., et al. (2013). Improved orange and red Ca(2)+/- indicators and photophysical considerations for  
1154 optogenetic applications. *ACS Chem Neurosci* 4, 963-972. 10.1021/cn400012b.
- 1155 Yang, J.M., Chi, W.Y., Liang, J., Takayanagi, S., Iglesias, P.A., and Huang, C.H. (2021). Deciphering cell  
1156 signaling networks with massively multiplexed biosensor barcoding. *Cell* 184, 6193-6206 e6114.  
1157 10.1016/j.cell.2021.11.005.
- 1158 Zhang, P., Smith-Nguyen, E.V., Keshwani, M.M., Deal, M.S., Kornev, A.P., and Taylor, S.S. (2012).



- 1159 Structure and allostery of the PKA RIIbeta tetrameric holoenzyme. *Science* 335, 712-716.
- 1160 10.1126/science.1213979.
- 1161 Zhao, Y., Araki, S., Wu, J., Teramoto, T., Chang, Y.F., Nakano, M., Abdelfattah, A.S., Fujiwara, M., Ishihara,
- 1162 T., Nagai, T., and Campbell, R.E. (2011). An expanded palette of genetically encoded Ca(2)(+) indicators.
- 1163 *Science* 333, 1888-1891. 10.1126/science.1208592.
- 1164 Zhong, H., Sia, G.M., Sato, T.R., Gray, N.W., Mao, T., Khuchua, Z., Haganir, R.L., and Svoboda, K. (2009).
- 1165 Subcellular dynamics of type II PKA in neurons. *Neuron* 62, 363-374. 10.1016/j.neuron.2009.03.013.

Figure 1

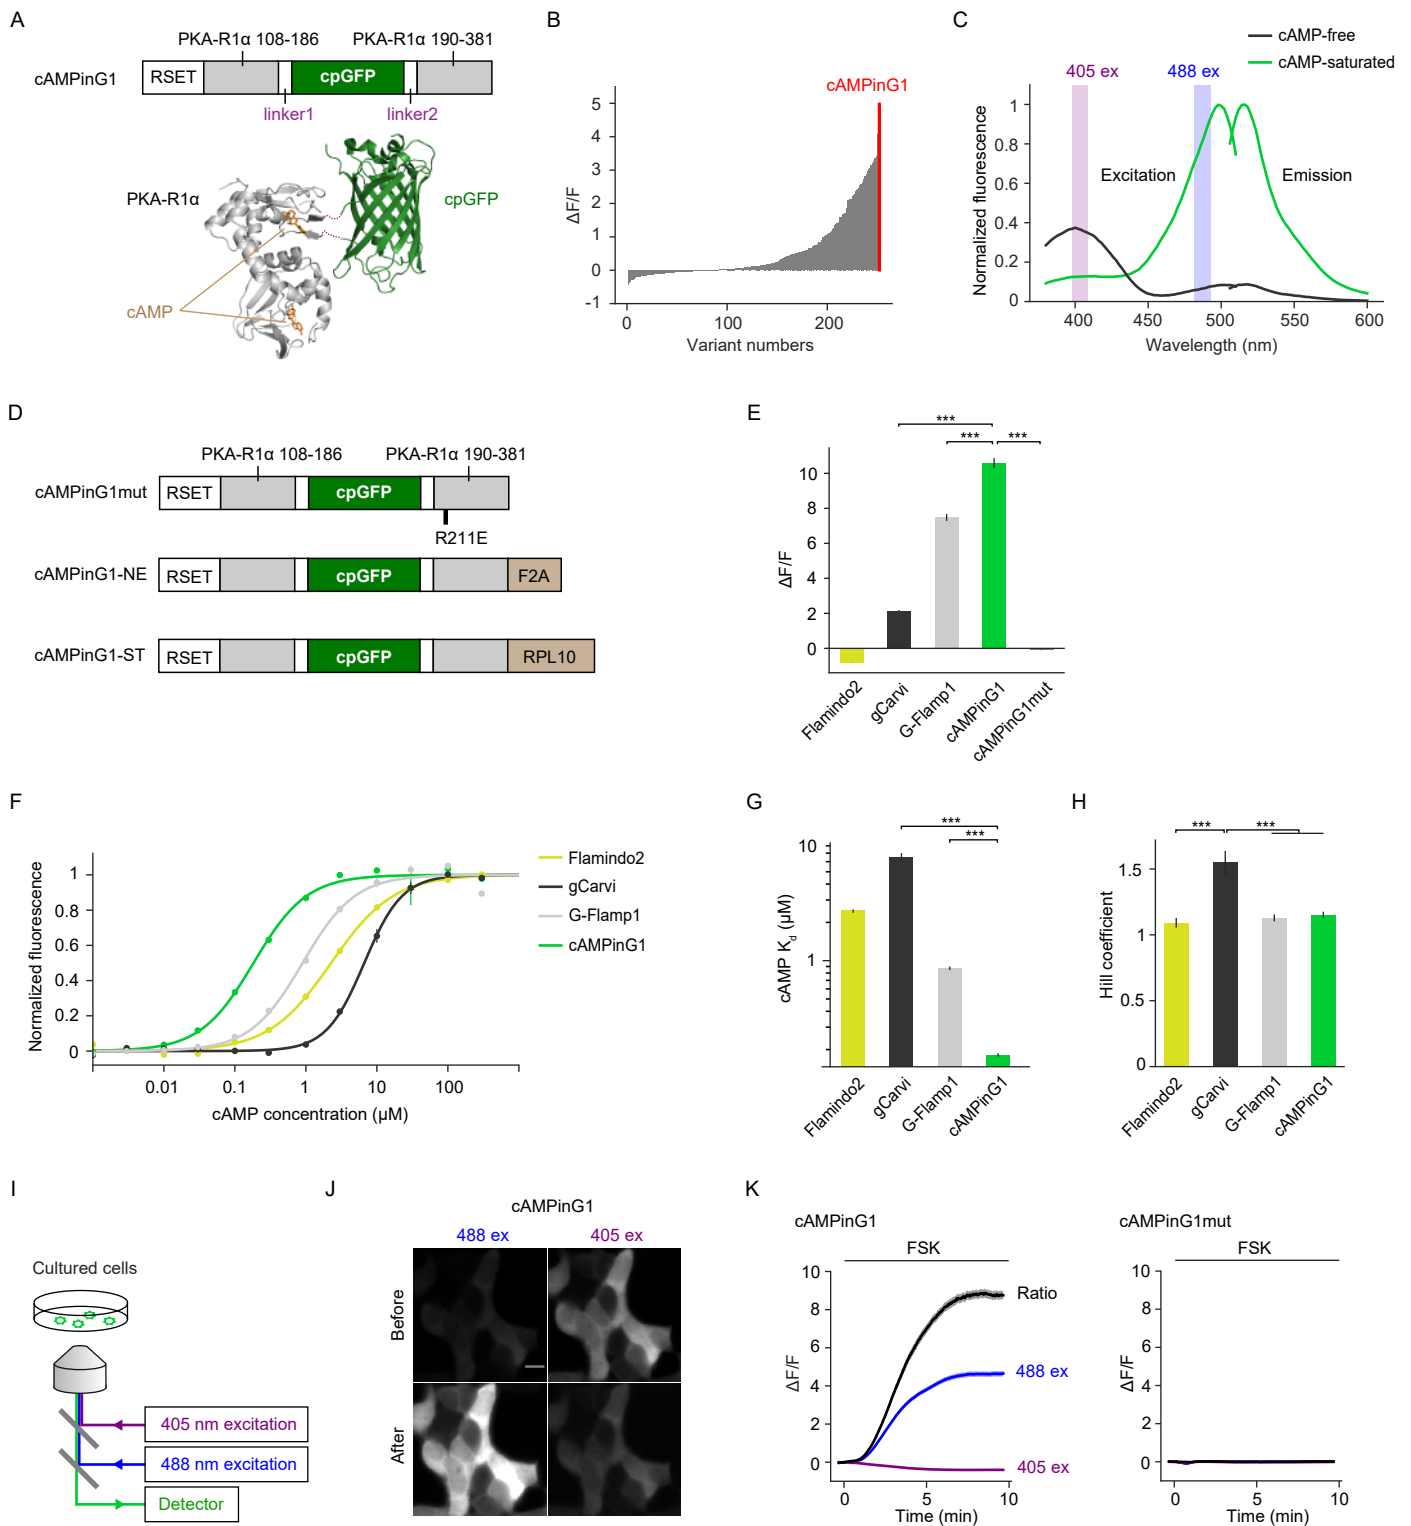

**Figure 1. Sensor design and *in vitro* characterization of cAMPinG1**

(A) Top: Primary structure of cAMPinG1. cpGFP and two flanking linkers are inserted into a loop of PKA-R1 $\alpha$  close to the cAMP-binding site. Bottom: Tertiary structures of cAMP-binding PKA-R1 $\alpha$  (gray, PDB: 1RGS, cpGFP insertion site of cAMPinG1 is hidden) with cAMP (orange) and cpGFP (green, PDB: 3WLD, calmodulin, and M13 domains are hidden) are shown. The linkers between the two domains are depicted as purple dotted lines.

(B) *In vitro* screening results of 251 variants, resulting in the variant named cAMPinG1 (red).

(C) Excitation and emission spectra of cAMPinG1 in cAMP-free (black) and cAMP-saturated (light green) states. Blue and violet excitation wavelengths used for ratiometric imaging in the later figures are indicated as shaded regions in the later figures. Note that green fluorescence intensity increased upon cAMP binding when excited with blue light (488 nm) but decreased when excited with violet light (405nm).

(D) Primary structures of cAMPinG1mut (inactive mutant), cAMPinG1-NE (nuclear-excluded), and cAMPinG1-NE (soma-targeted).

(legend continued on next page)

- (E) The change in fluorescence intensity ( $\Delta F/F$ ) of green cAMP sensors to cAMP in HEK cell lysate. cAMPinG1 had the largest  $\Delta F/F$  in the side-by-side comparison. n = 4 wells (Flamindo2), n = 4 wells (gCarvi), n = 4 wells (G-Flamp1), n = 4 wells (cAMPinG1), n = 4 wells (cAMPinG1mut). Tukey' s post hoc test following one-way ANOVA.
- (F) cAMP titration curves of cAMP sensors. Response of Flamindo2 to cAMP is inversed ( $-\Delta F/F$ ). The x-axis is logarithmic. n = 4 wells (Flamindo2), n = 4 wells (gCarvi), n = 4 wells (G-Flamp1), n = 4 wells (cAMPinG1).
- (G)  $K_d$  values of cAMP sensors. cAMPinG1 and cAMPinG1-NE had the highest cAMP affinity among the green cAMP sensors. The y-axis is logarithmic. n = 4 wells (Flamindo2), n = 4 wells (gCarvi), n = 4 wells (G-Flamp1), n = 4 wells (cAMPinG1). Tukey' s post hoc test following one-way ANOVA.
- (H) Hill coefficients of cAMP sensors. n = 4 wells (Flamindo2), n = 4 wells (gCarvi), n = 4 wells (G-Flamp1), n = 4 wells (cAMPinG1). Tukey' s post hoc test following one-way ANOVA.
- (I) Schematic of the imaging settings. Blue (488 nm) and violet (405 nm) excitation lights were used in turns for ratiometric imaging in HEK293T cells.
- (J) Representative images of HEK293T cells expressing cAMPinG1 excited by blue (488 nm, left) and violet (405 nm, right) lights before (top) and after (bottom) 50  $\mu$ M forskolin application. Scale bar, 10  $\mu$ m.
- (K)  $\Delta F/F$  of cAMPinG1 (left) and the inactive mutant cAMPinG1mut (right) in response to 50  $\mu$ M forskolin application. Blue (blue line) and violet lights (violet line) were used for excitation sequentially, and the ratio of fluorescence excited with blue and violet lights (488 ex / 405 ex) was also shown (black line). n = 196 (cAMPinG1), n = 164 (cAMPinG1mut) cells. All shaded areas and error bars denote the SEM.

Figure 2

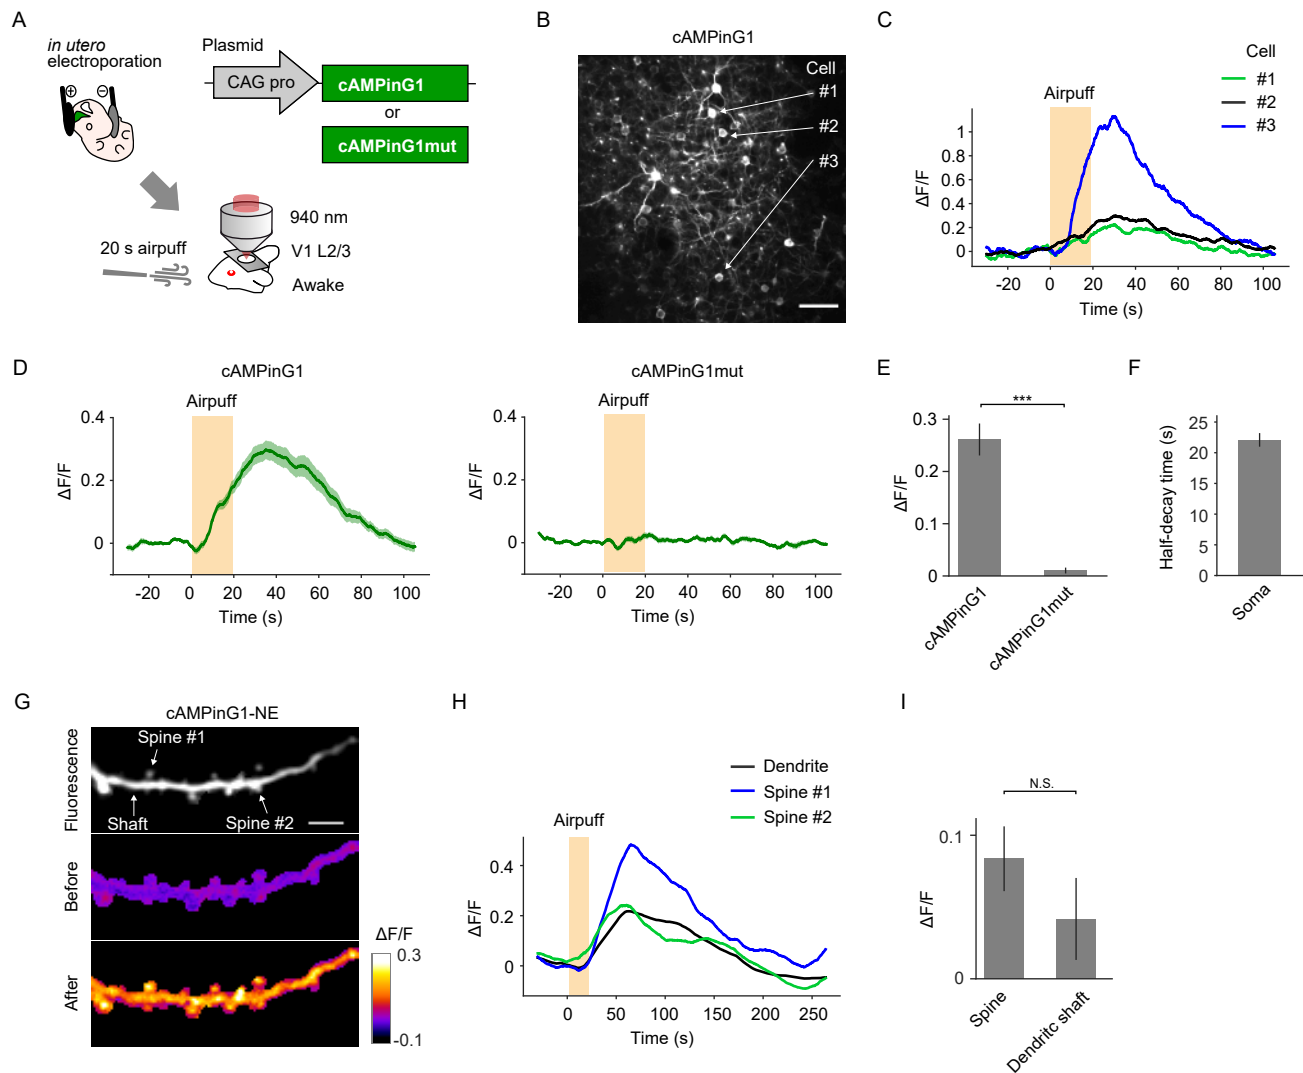

**Figure 2. *In vivo* two-photon cAMPinG1 imaging in somata and spines**

(A) Schematic of the experimental procedure of cAMPinG1 somatic imaging. cAMPinG1 or cAMPinG1mut was delivered to neurons in layer 2/3 (L2/3) of the mouse primary visual cortex (V1) by in utero electroporation.

(B) A representative *in vivo* two-photon fluorescence image of cAMPinG1. Scale bar, 50  $\mu$ m.

(C) Single-trial cAMP traces of representative 3 cells. The orange box indicates the timing of the stimulus.

(D) Averaged traces of somatic signals of cAMPinG1 (left) and cAMPinG1mut (right) in response to airpuff stimulation.  $n = 47$  neurons in 4 mice (cAMPinG1),  $n = 39$  neurons in 4 mice (cAMPinG1mut).

(E) Averaged  $\Delta F/F$  of cAMPinG1 and cAMPinG1mut in response to airpuff stimulation.  $n = 47$  neurons in 4 mice (cAMPinG1),  $n = 39$  neurons in 4 mice (cAMPinG1mut). Unpaired t-test.

(F) Half-decay time of somatic cAMP transients in response to airpuff.  $n = 47$  neurons in 4 mice.

(G) A representative image of cAMPinG1 imaging in spines and their shaft. cAMPinG1 fluorescence (top),  $\Delta F/F$  before (middle) and after (bottom) airpuff. Scale bar, 5  $\mu$ m.

(H) Representative traces of a dendritic shaft and two spines. The orange square indicates the timing of the stimulus.

(I) Averaged  $\Delta F/F$  of cAMPinG1 in dendritic shafts and spines.  $n = 56$  spines,  $n = 11$  shafts in 4 mice. Unpaired t-test. All shaded areas and error bars denote the SEM.

Figure 3

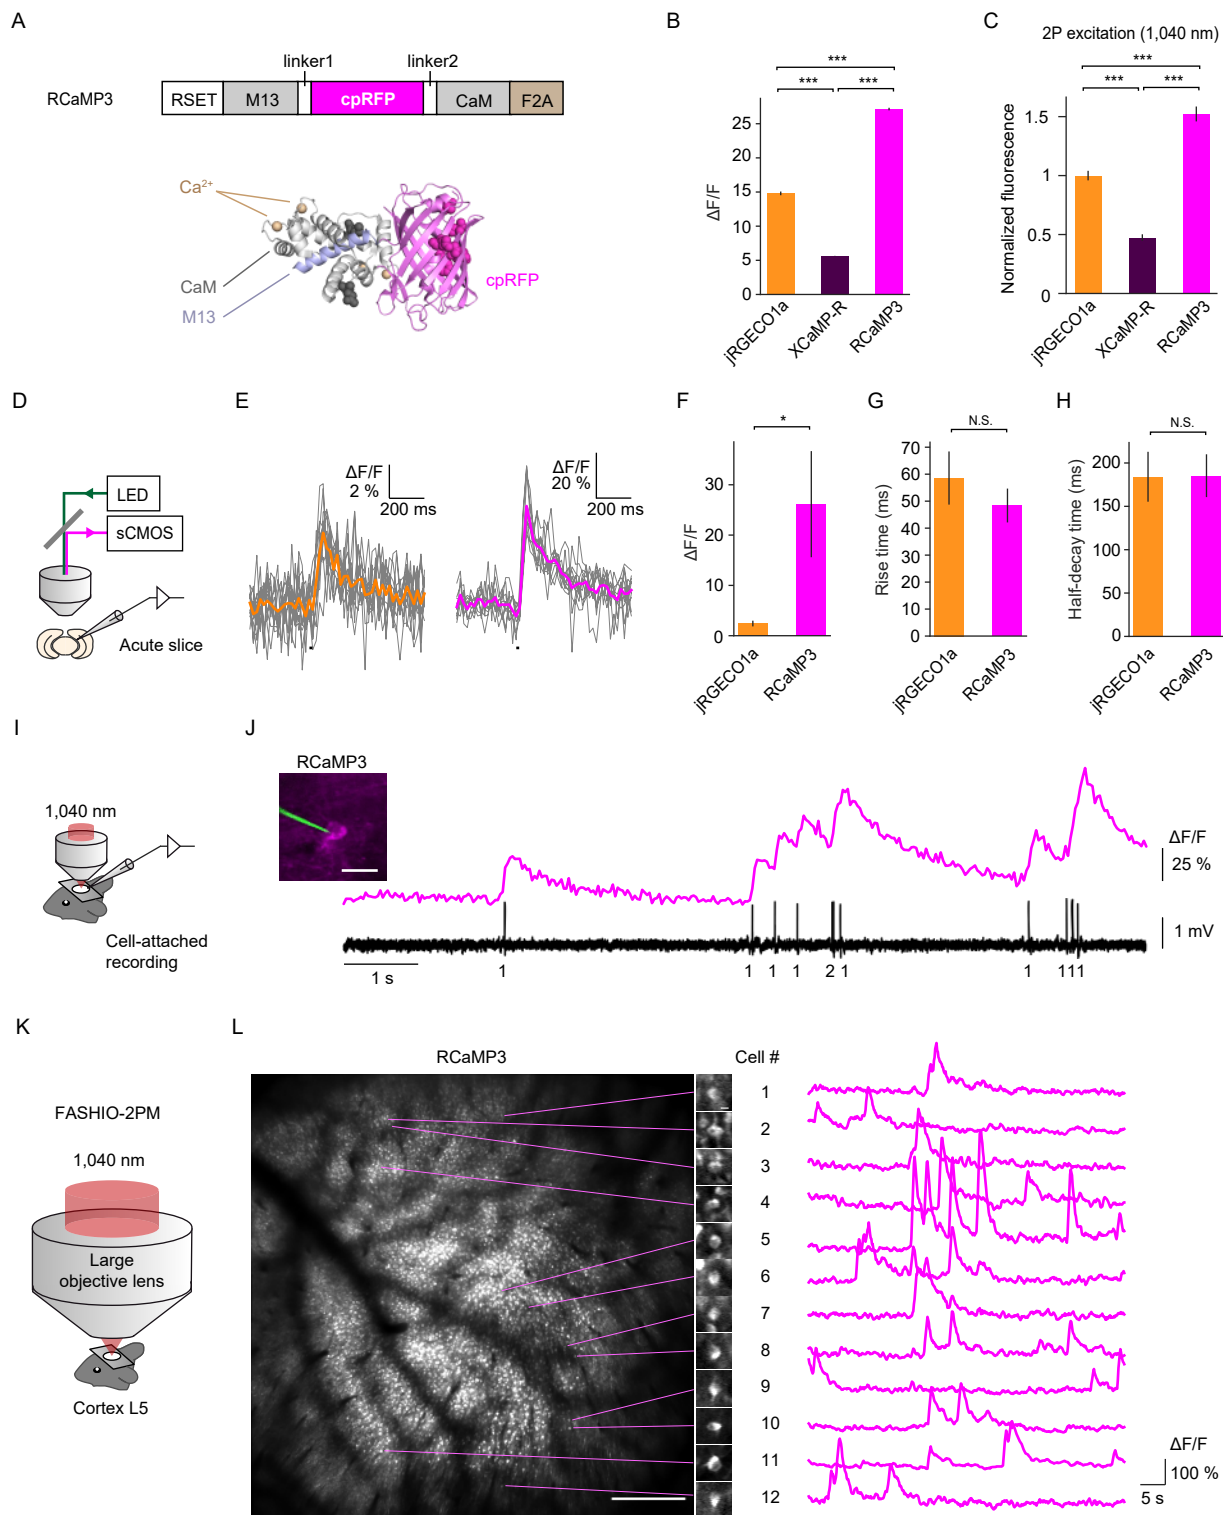

**Figure 3. Engineering and characterization of RCaMP3**

(A) Top: Primary structure of RCaMP3. The location of substitutions relative to R-GECO1 is indicated in R-GECO1 numbering. Bottom: Tertiary structures of R-GECO1 (PDB: 4I2Y) depicted as ribbon diagrams. Amino acids mutated in RCaMP3 are indicated in sphere shape.

(B)  $\Delta F/F$  of red Ca<sup>2+</sup> indicators in HEK cell lysate. RCaMP3 had the largest  $\Delta F/F$ . n = 4 wells (jRGECO1a), n = 4 wells (XCaMP-R), n = 4 wells (RCaMP3). Tukey' s post hoc test following one-way ANOVA.

(C) Two-photon (1,040 nm) fluorescence intensities of red Ca<sup>2+</sup> sensors in live HEK cells in the presence of ionomycin application. n = 360 (jRGECO1a), n = 267 (XCaMP-R), n = 376 (RCaMP3) cells. Tukey' s post hoc test following one-way ANOVA.

(D) Schematic of the experimental procedure of Ca<sup>2+</sup> imaging under a whole-cell patch-clamp configuration in acute brain slices.

(E) Representative Ca<sup>2+</sup> traces of jRGECO1a and RCaMP3 in response to a single action potential. Grey lines denote individual traces (10 trials), and colored thick lines denote average response. The black vertical lines indicate stimuli.

(F-H)  $\Delta F/F$  (F), rise time (G), and half-decay time (H) of jRGECO1a and RCaMP3 in response to a single action potential. n = 7 neurons (jRGECO1a), n = 6 neurons (RCaMP3).

(legend continued on next page)

- (I) Schematic of the experimental procedure of  $\text{Ca}^{2+}$  imaging under a cell-attached recording in vivo.
- (J) Representative trace of simultaneous measurement of RCaMP3 fluorescence and action potentials in vivo. The number of spikes for each event is indicated below the trace. The image shows a neuron expressing RCaMP3 (magenta) with the recording pipette (green). Scale bar, 20  $\mu\text{m}$ .
- (K) Schematic of the experimental procedure of two-photon mesoscale  $\text{Ca}^{2+}$  imaging using fast-scanning high optical invariant two-photon microscopy (FASHIO-2PM). Cortical layer 5 (L5) neurons in the field-of-view (FOV,  $3.0 \times 3.0 \text{ mm}^2$ ) were imaged by 1,040 nm excitation.
- (L) Left: A representative full FOV of FASHIO-2PM. Scale bar, 500  $\mu\text{m}$ . Right: Magnified images and  $\text{Ca}^{2+}$  traces of representative 12 neurons. Scale bar, 10  $\mu\text{m}$ . All error bars denote the SEM.

Figure 4

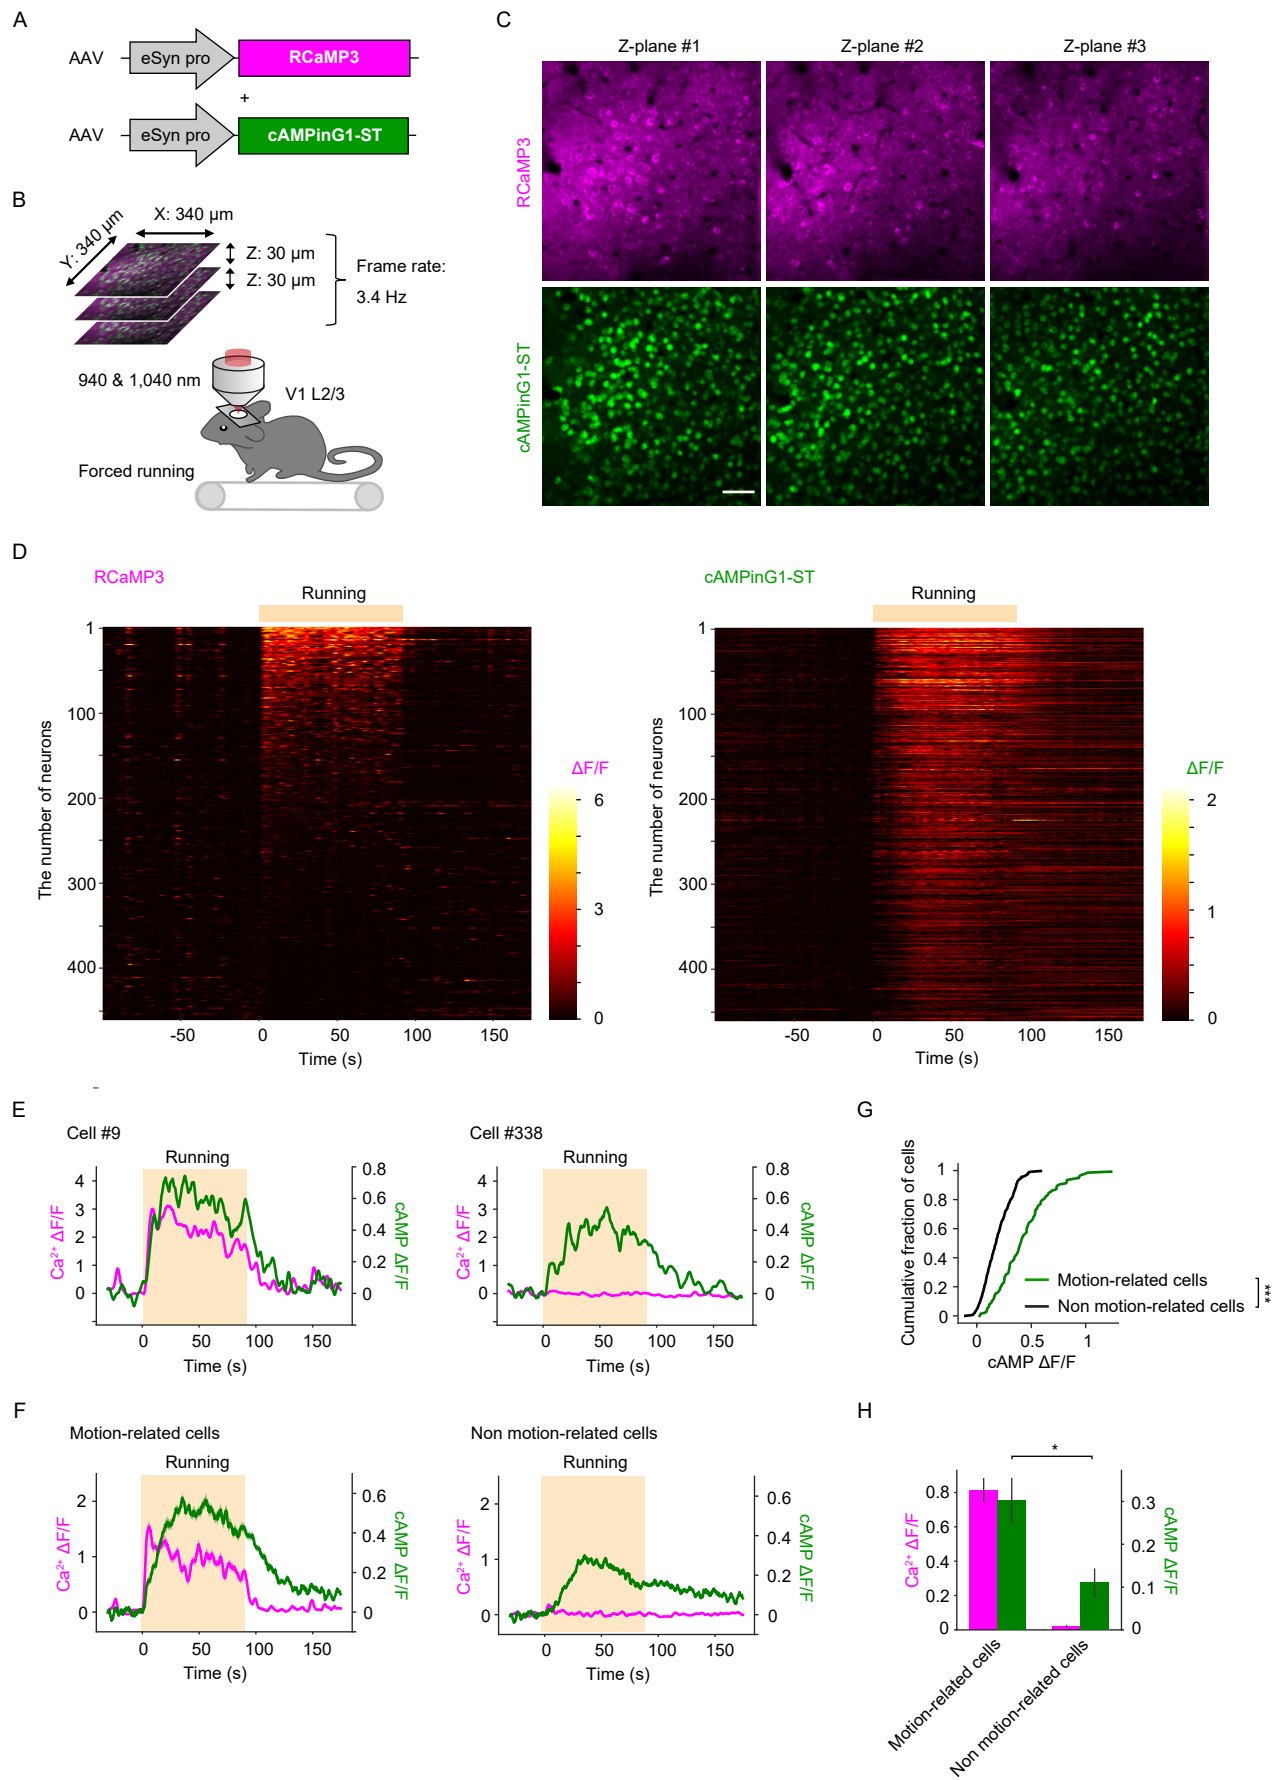

**Figure 4. *In vivo* dual-color imaging for  $\text{Ca}^{2+}$  and cAMP during forced running**

(A) Schematic of AAVs. AAVs encoding RCaMP3 and cAMPinG1-ST were co-injected into the L2/3 of the V1.

(B) Schematic of the experimental procedure. Sequential excitation at 940 nm and 1,040 nm was used for dual-color imaging of cAMPinG1-ST and RCaMP3.

Three optical planes spaced 30  $\mu\text{m}$  apart were imaged at 3.4 Hz per plane using a piezo objective scanner.

(C) Representative images of RCaMP3 and cAMPinG1-ST. Scale bar, 50  $\mu\text{m}$ .

(legend continued on next page)

- (D) Single-trial traces of RCaMP3 and cAMPinG1-ST. Cells are sorted according to  $\Delta F/F$  of RCaMP3 during running.  $n = 461$  cells in 1 mouse.
- (E) Single-trial traces of RCaMP3 (magenta) and cAMPinG1-ST (green) of two representative cells. The orange box indicates the period of forced running. The cell number on the top corresponds to the number in (D).
- (F) Averaged fluorescence transients of RCaMP3 (magenta) and cAMPinG1-ST (green).  $n = 137$  cells in 1 mouse (left),  $n = 324$  cells in 1 mouse (right).
- (G) Cumulative plot of mean cAMP  $\Delta F/F$  of motion-related (green) and non-related (black) cells during forced running.  $n = 137$  cells in 1 mouse (green),  $n = 324$  cells in 1 mouse (black). Kolmogorov–Smirnov test.
- (H) Averaged  $\Delta F/F$  of RCaMP3 (magenta) and cAMPinG1-ST (green) during forced running.  $n = 3$  mice. Paired t-test. All shaded areas and error bars denote the SEM.



Figure 5

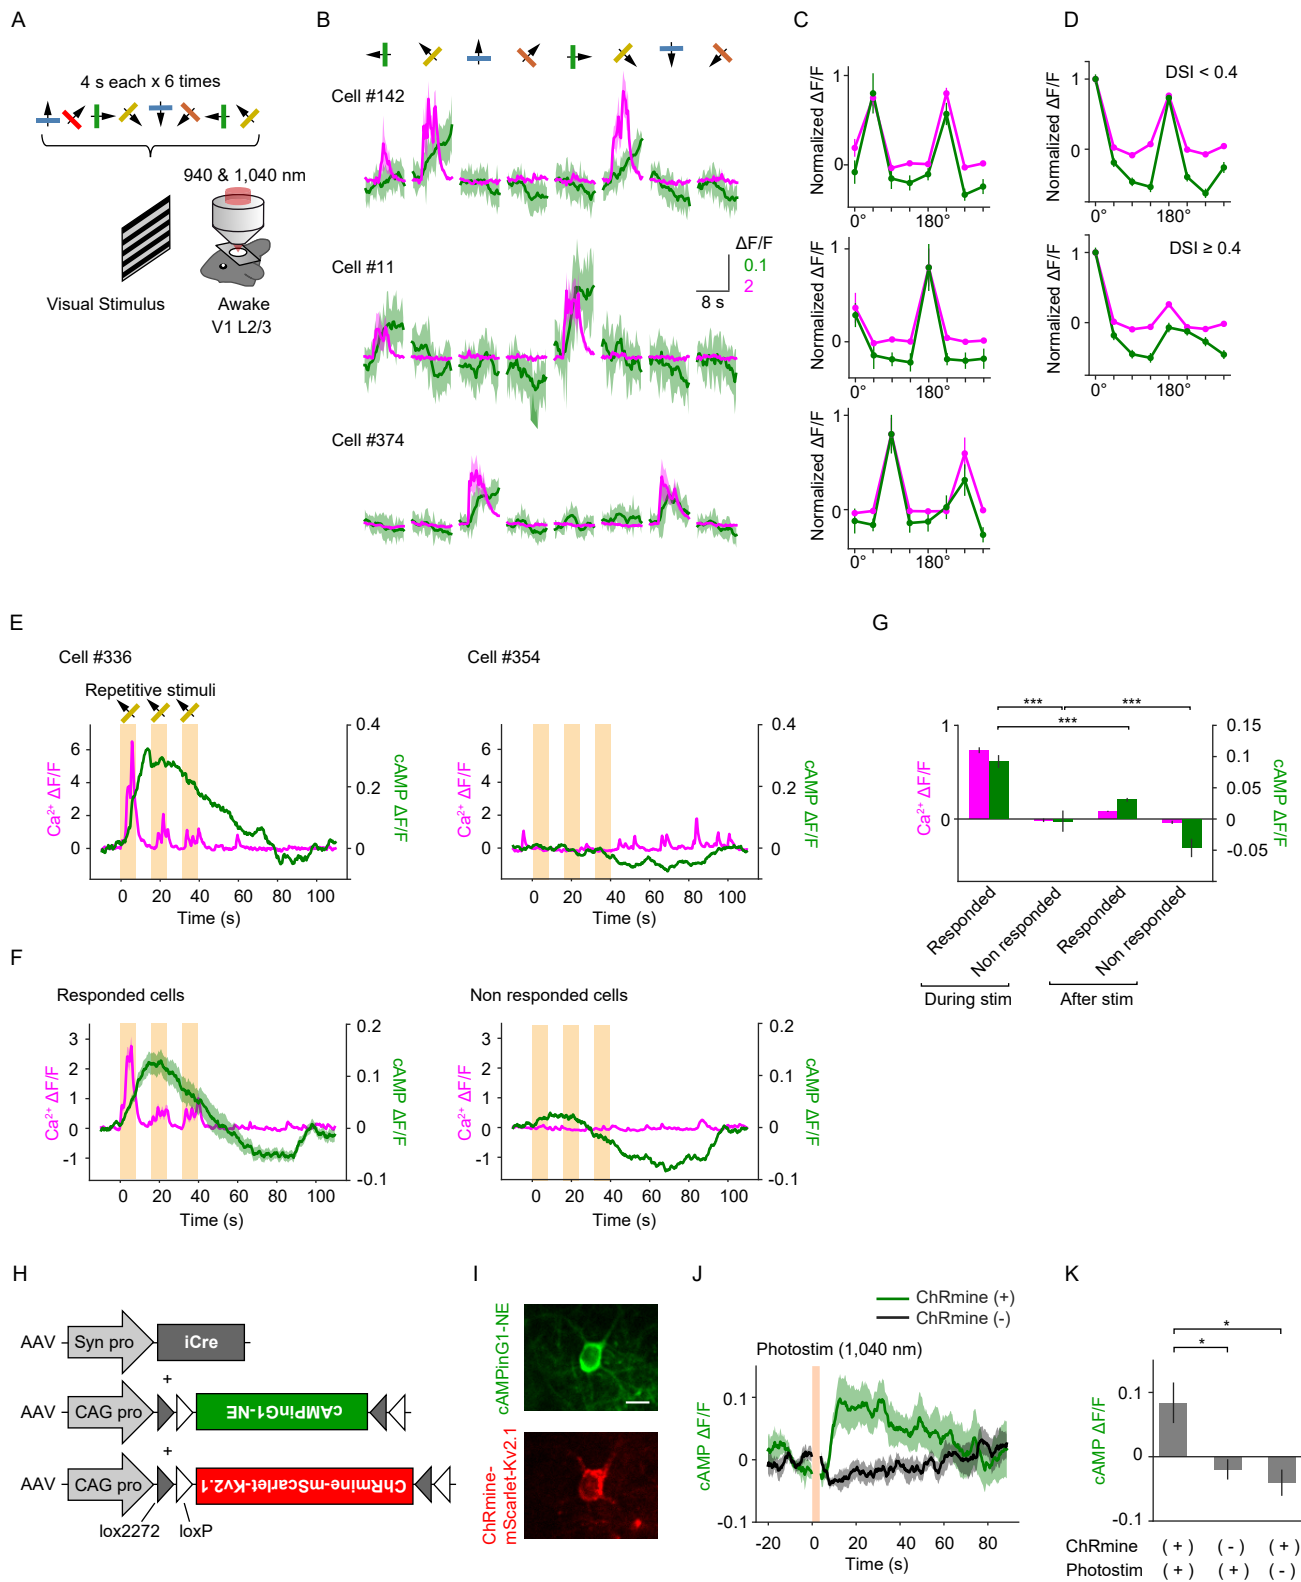

**Figure 5. *In vivo* dual-color imaging for Ca<sup>2+</sup> and cAMP during visual stimulation**

(A) Schematic of the experimental procedure. Moving gratings of 8 directions were used to induce cell-specific Ca<sup>2+</sup> transients in L2/3 neurons of the V1. (B) Averaged fluorescence transients of RCaMP3 (magenta) and cAMPinG1-ST (green) of 3 representative cells. (C) Direction-selective visual responses of RCaMP3 (magenta) and cAMPinG1-ST (green) of the 3 representative cells in (B). (D) Averaged direction-selective visual responses of RCaMP3 (magenta) and cAMPinG1-ST (green). Top: neurons showing a direction selectivity index (DSI) < 0.4 in Ca<sup>2+</sup> response. n = 94 cells in 3 mice. Bottom: neurons showing a direction selectivity index (DSI) ≥ 0.4 in Ca<sup>2+</sup> response. n = 101 cells in 3 mice. (E) Single-trial traces of RCaMP3 (magenta) and cAMPinG1-ST (green) of 2 representative cells. The orange box indicates the period of visual stimuli. (F) Averaged fluorescence transients of RCaMP3 (magenta) and cAMPinG1-ST (green). n = 53 cells in 1 mouse (left), n = 408 cells in 1 mouse (right). (G) Averaged ΔF/F of RCaMP3 (magenta) and cAMPinG1-ST (green) during and after the visual stimuli. n = 3 mice. Paired t-test. (H) Schematic of AAVs for sparse expression of cAMPinG1-NE and soma-targeted ChRmine.

(legend continued on next page)

(I) Representative fluorescence images of cAMPinG1-NE and ChRmine-mScarlet-Kv2.1. Scale bar, 10  $\mu\text{m}$ .

(J) Averaged fluorescence transients of cAMPinG1-NE in response to 1,040 nm photostimulation. n = 11 neurons in 3 mice (ChRmine (+), green), n = 11 neurons in 3 mice (ChRmine (-), black).

(K) Averaged  $\Delta F/F$  of cAMPinG1-NE in response to 1,040 nm photostimulation. n = 11 neurons in 3 mice (ChRmine (+), photostim (+)), n = 11 neurons in 3 mice (ChRmine (-), photostim (+)), n = 9 neurons in 3 mice (ChRmine (+), photostim (-)). Tukey's post hoc test following one-way ANOVA. All shaded areas and error bars denote the SEM.

Figure 6

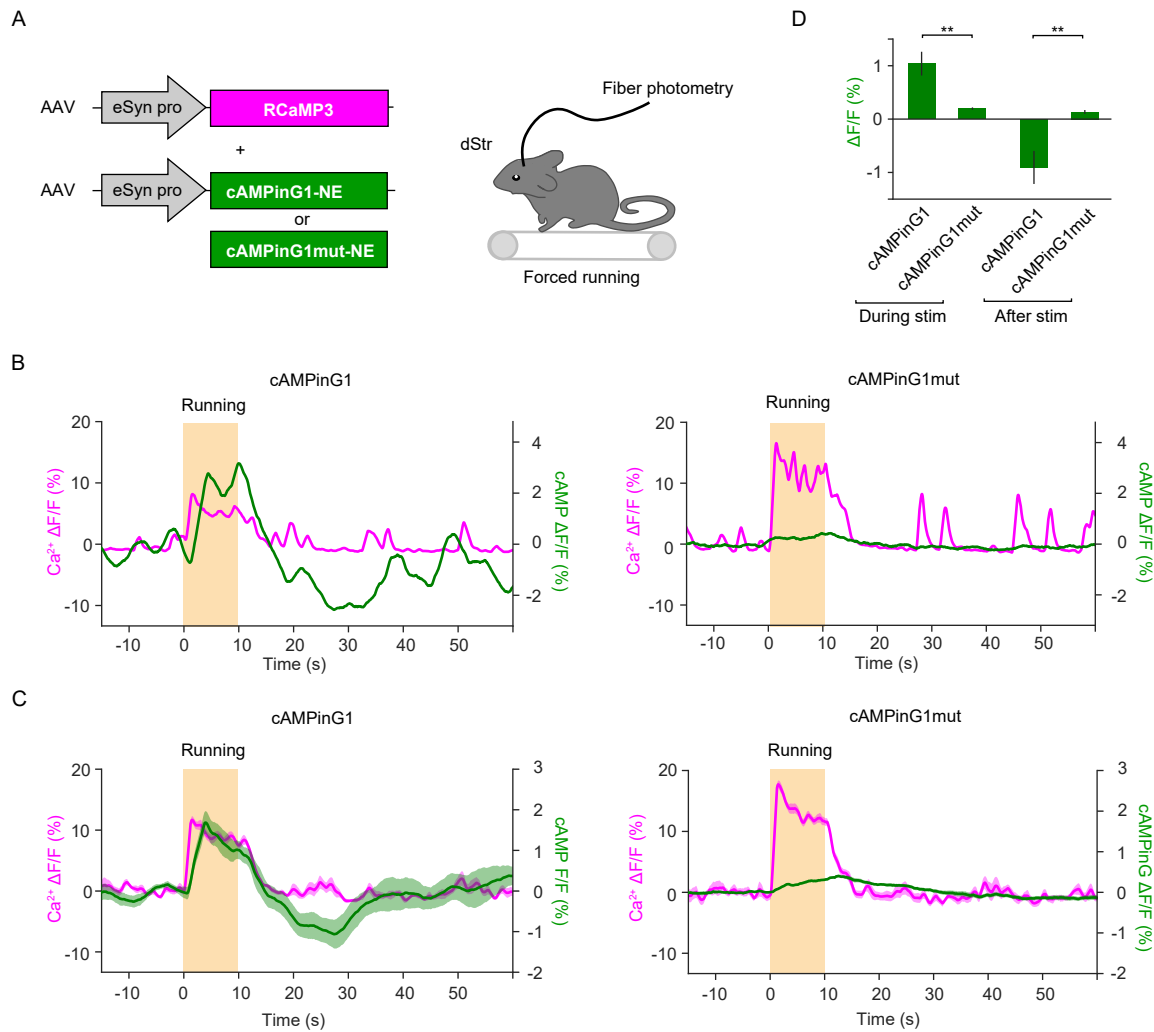

### Figure 6. Dual-color fiber photometry for Ca<sup>2+</sup> and cAMP

(A) Schematic of the experimental procedure. Dual-color fiber photometry was performed in the dorsal striatum (dStr) during a forced running task.

(B) Representative single-trial traces of cAMPinG1-NE (green, left), cAMPinG1mut-NE (green, right), and RCaMP3 (magenta) signals. The orange box indicates the period of forced running.

(C) Averaged fluorescence traces of cAMPinG1-NE (green, left), cAMPinG1mut-NE (green, right), and RCaMP3 (magenta) signals. n = 27 trials in 3 mice (left), n = 27 trials in 3 mice (right).

(D) Averaged ΔF/F of cAMPinG1-NE and cAMPinG1mut-NE during and after the stimulation. n = 27 trials in 3 mice (cAMPinG1-NE), n = 27 trials in 3 mice (cAMPinG1mut-NE). Unpaired t-test. All shaded areas and error bars denote the SEM.

Figure 7

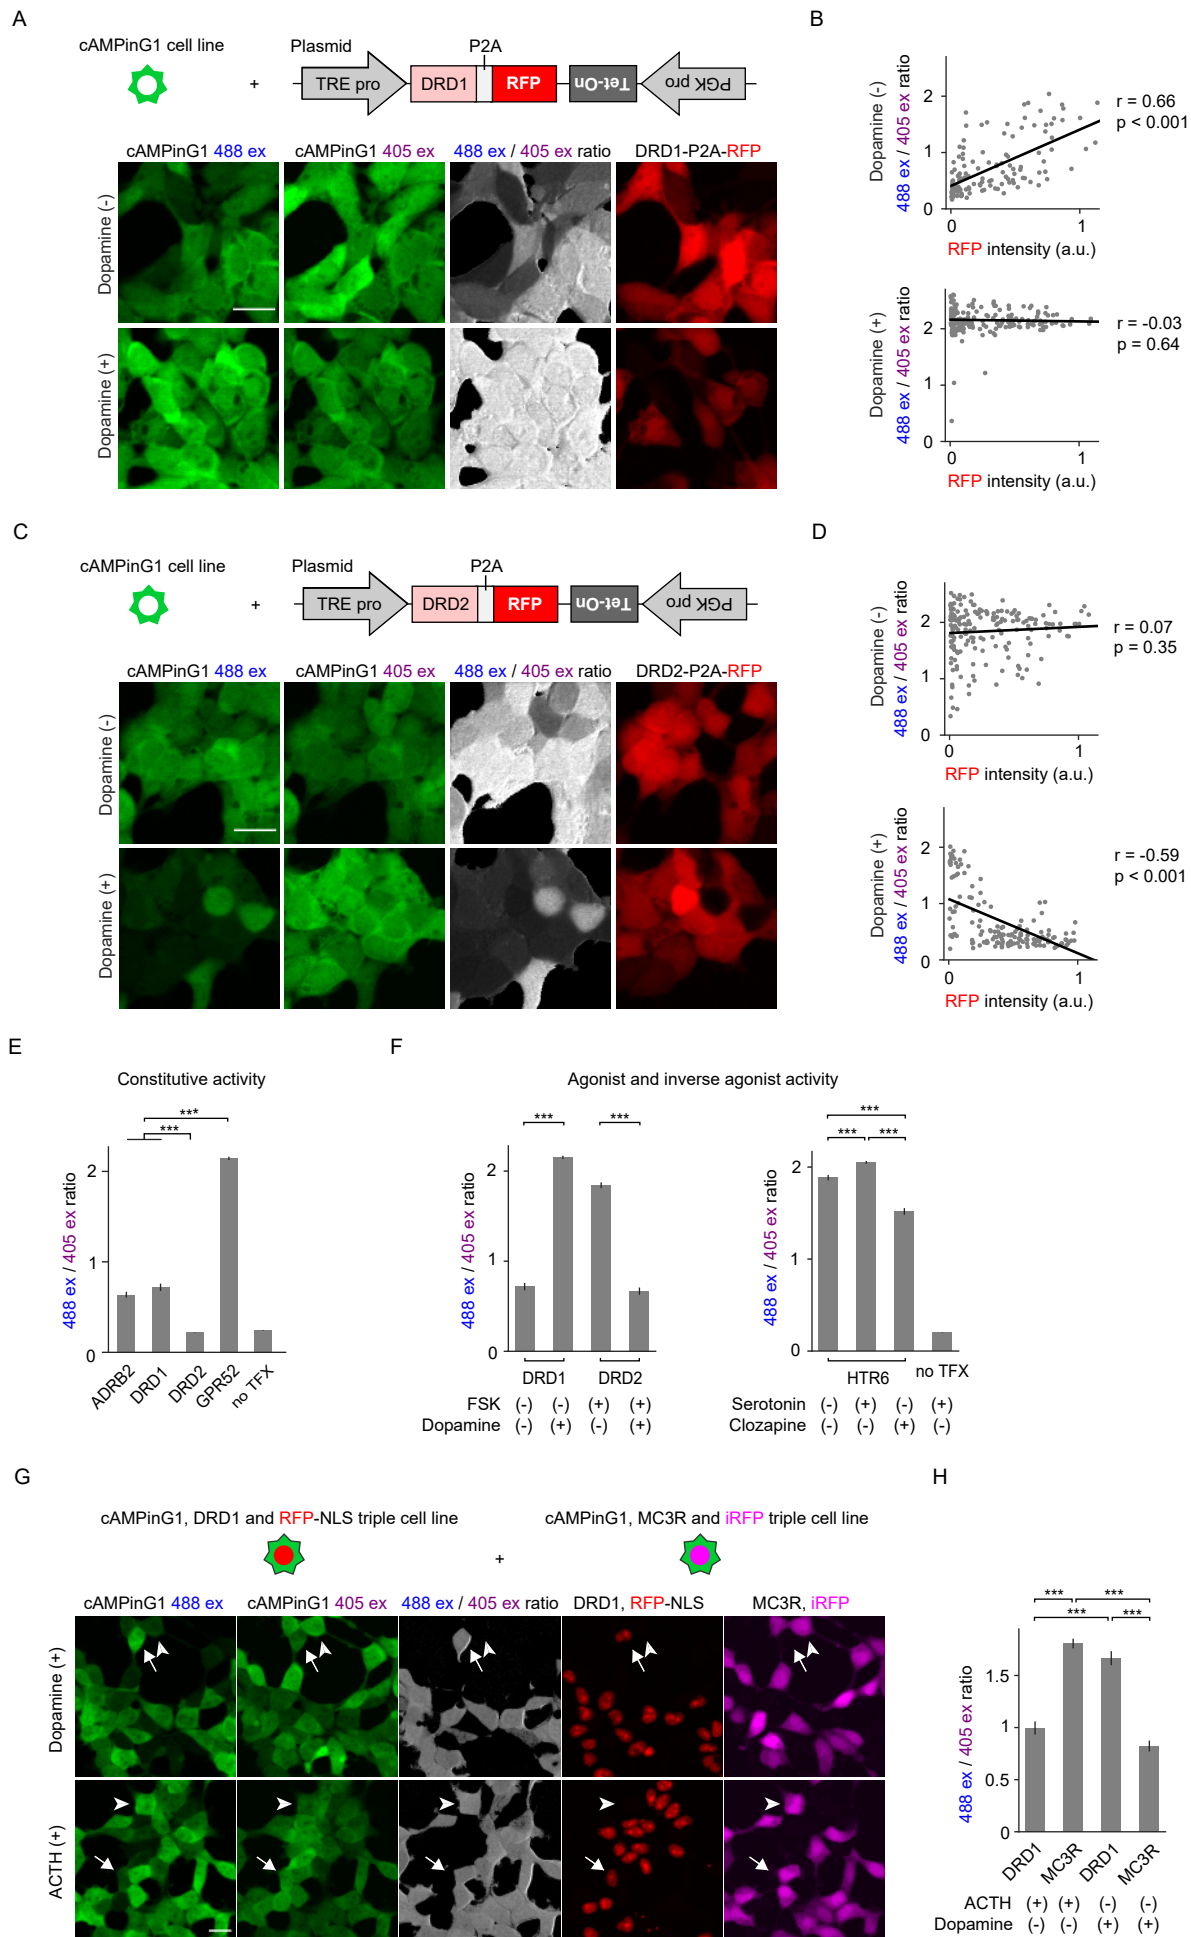

(legend on next page)

**Figure 7. Single-cell, single-timepoint cAMPinG1 imaging for GPCR biology and drug screening**

- (A) Schematic of the expression system (top). The plasmid encoding pTRE-DRD1-P2A-mCherry-reverse-PGK-TetOn was transfected into a cAMPinG1 stable cell line. Doxycycline was added 3 hours before the imaging to induce expression of DRD1-P2A-mCherry. Representative images of cAMPinG1 stable cell line expressing DRD1-P2A-RFP in the absence (middle) or presence (bottom) of 1,000 nM dopamine were taken by alternating 405/488/561 nm lasers excitation. Scale bar, 20  $\mu$ m.
- (B) Correlation between blue ex/violet ex ratio of cAMPinG1 and DRD1-P2A-RFP expression level. Individual dots indicate single cells. n = 141 (dopamine (-), top) and 190 (dopamine (+), bottom) cells. Pearson correlation coefficient in linear regression,  $r = 0.66$ ;  $p < 0.001$  (top) and  $r = -0.03$ ;  $p = 0.64$  (bottom).
- (C) Schematic of the expression system (top). Representative images of a cAMPinG1 cell line expressing DRD2-P2A-RFP in the absence (middle) or presence (bottom) of 1,000 nM dopamine were taken by alternating 405/488/561 nm lasers excitation. 0.5  $\mu$ M forskolin was applied in both conditions. Scale bar, 20  $\mu$ m.
- (D) Correlation between blue ex/violet ex ratio of cAMPinG1 and DRD2-P2A-RFP expression level. Individual dots indicate single cells. n = 180 (dopamine (-), top) and 154 (dopamine (+), bottom) HEK293T cells. Pearson correlation coefficient in linear regression,  $r = 0.07$ ;  $p = 0.35$  (top) and  $r = -0.59$ ;  $p < 0.001$  (bottom).
- (E) The blue ex/violet ex ratio of cAMPinG1 cells transiently expressing GPCRs-P2A-RFP in the absence of ligands, indicating the constitutive activity of each GPCR. n = 158 (ARDB2), 141 (DRD1), 151 (DRD2), 178 (GPR52), 126 (no TFX) cells. Tukey's post hoc test following one-way ANOVA.
- (F) Blue ex/violet ex ratio of cAMPinG1 cell line expressing GPCRs-P2A-RFP with or without agonists. Note that clozapine is known to act as an inverse agonist against HTR6. n = 141 (DRD1), 190 (Dopamine + DRD1), 180 (FSK + DRD2), 154 (Dopamine + FSK + DRD2) cells (left). n = 159 (HTR6), 151 (5HT + HTR6), 135 (Clozapine + HTR6), 204 (5HT + no TFX) cells (right). Tukey's post hoc test following one-way ANOVA.
- (G) Schematic of the expression system (top). Representative images of a mixture of cell lines stably expressing cAMPinG1, DRD1 and RFP, and cell lines stably expressing cAMPinG1, MC3R and iRFP in the presence of 100 nM dopamine (middle) or 1,000nM ACTH (bottom). Representative cells expressing DRD1/RFP or MC3R/iRFP were indicated by arrows or arrowheads, respectively. Scale bar, 20  $\mu$ m.
- (H) The blue ex/violet ex ratio of each cell line in the presence of dopamine or ACTH. Both cell line showed ligand-specific cAMP elevation. n = 95 (ACTH + DRD1), 87 (ACTH + MC3R), 72 (dopamine + DRD1), 161 (dopamine + MC3R) cells. Tukey's post hoc test following one-way ANOVA. All error bars denote the SEM.
